# Supplementary material for: One-pot synthesis of dimerized arenes and heteroarenes under mild conditions using Co(i) as an active catalyst
Source: Royal Society of Chemistry journal article supplement (doi:10.1039/d2ob01738e), 2022-01-01
Supplement: d2ob01738e1.pdf [file d2ob01738e1.pdf]

Electronic Supporting Information  
for  
**One-pot synthesis of dimerized arenes and heteroarenes  
under mild condition using Co(I) as active catalyst**

Adwitiya Pal, Arunabha Thakur\*

Department of Chemistry, Jadavpur University, Kolkata- 700032, India.

Phone : 0332-4572779, +919937760940.

Email: [arunabha.thakur@jadavpuruniversity.in](mailto:arunabha.thakur@jadavpuruniversity.in), [babuiitm07@gmail.com](mailto:babuiitm07@gmail.com)

**Table of Contents**

| <b><u>Contents</u></b>                                                                              | <b><u>Page no.</u></b> |
|-----------------------------------------------------------------------------------------------------|------------------------|
| <b>Fig S1:</b> <sup>1</sup> H NMR spectra of ligand <b>L1</b> in CDCl <sub>3</sub> .                | 4                      |
| <b>Fig S2:</b> <sup>13</sup> C NMR spectra of ligand <b>L1</b> in CDCl <sub>3</sub> .               | 5                      |
| <b>Fig S3:</b> HRMS of ligand <b>L1</b> .                                                           | 6                      |
| <b>Fig S4:</b> HRMS of complex <b>1</b> .                                                           | 7                      |
| <b>Fig S5:</b> IR spectra of free ligand <b>L1</b> and Co-complex <b>1</b> in solid state at 22 °C. | 8                      |
| Lithiation of compounds                                                                             | 9                      |
| <b>Table S1.</b> Optimization of reaction conditions for the dimerization of heteroarenes.          | 11                     |
| <b>Table S2.</b> Table for known and unknown compounds                                              | 11                     |
| <b>Fig S6:</b> <sup>1</sup> H NMR spectra of compound <b>3a</b> in CDCl <sub>3</sub> .              | 12                     |
| <b>Fig S7:</b> <sup>13</sup> C NMR spectra of compound <b>3a</b> in CDCl <sub>3</sub> .             | 13                     |
| <b>Fig S8:</b> <sup>1</sup> H NMR spectra of compound <b>3b</b> in CDCl <sub>3</sub> .              | 14                     |
| <b>Fig S9:</b> <sup>13</sup> C NMR spectra of compound <b>3b</b> in CDCl <sub>3</sub> .             | 15                     |
| <b>Fig S10:</b> <sup>1</sup> H NMR spectra of compound <b>3c</b> in CDCl <sub>3</sub> .             | 16                     |
| <b>Fig S11:</b> <sup>13</sup> C NMR spectra of compound <b>3c</b> in CDCl <sub>3</sub> .            | 17                     |
| <b>Fig S12:</b> <sup>1</sup> H NMR spectra of compound <b>3d</b> in CDCl <sub>3</sub> .             | 18                     |
| <b>Fig S13:</b> <sup>13</sup> C NMR spectra of compound <b>3d</b> in CDCl <sub>3</sub> .            | 19                     |

|                                                                                        |    |
|----------------------------------------------------------------------------------------|----|
| <b>Fig S14:</b> $^1\text{H}$ NMR spectra of compound <b>3e</b> in $\text{CDCl}_3$ .    | 20 |
| <b>Fig S15:</b> $^{13}\text{C}$ NMR spectra of compound <b>3e</b> in $\text{CDCl}_3$ . | 21 |
| <b>Fig S16:</b> $^1\text{H}$ NMR spectra of compound <b>3f</b> in $\text{CDCl}_3$ .    | 22 |
| <b>Fig S17:</b> $^{13}\text{C}$ NMR spectra of compound <b>3f</b> in $\text{CDCl}_3$ . | 23 |
| <b>Fig S18:</b> $^1\text{H}$ NMR spectra of compound <b>3g</b> in $\text{CDCl}_3$ .    | 24 |
| <b>Fig S19:</b> $^{13}\text{C}$ NMR spectra of compound <b>3g</b> in $\text{CDCl}_3$ . | 25 |
| <b>Fig S20:</b> $^1\text{H}$ NMR spectra of compound <b>3h</b> in $\text{CDCl}_3$ .    | 26 |
| <b>Fig S21:</b> $^{13}\text{C}$ NMR spectra of compound <b>3h</b> in $\text{CDCl}_3$ . | 27 |
| <b>Fig S22:</b> $^1\text{H}$ NMR spectra of compound <b>3i</b> in $\text{CDCl}_3$ .    | 28 |
| <b>Fig S23:</b> $^{13}\text{C}$ NMR spectra of compound <b>3i</b> in $\text{CDCl}_3$ . | 29 |
| <b>Fig S24:</b> $^1\text{H}$ NMR spectra of compound <b>3j</b> in $\text{CDCl}_3$ .    | 30 |
| <b>Fig S25:</b> $^1\text{H}$ NMR spectra of compound <b>3k</b> in $\text{CDCl}_3$ .    | 31 |
| <b>Fig S26:</b> $^{13}\text{C}$ NMR spectra of compound <b>3k</b> in $\text{CDCl}_3$ . | 32 |
| <b>Fig S27:</b> $^1\text{H}$ NMR spectra of compound <b>3l</b> in $\text{CDCl}_3$ .    | 33 |
| <b>Fig S28:</b> $^{13}\text{C}$ NMR spectra of compound <b>3l</b> in $\text{CDCl}_3$ . | 34 |
| <b>Fig S29:</b> $^1\text{H}$ NMR spectra of compound <b>3m</b> in $\text{CDCl}_3$ .    | 35 |
| <b>Fig S30:</b> $^{13}\text{C}$ NMR spectra of compound <b>3m</b> in $\text{CDCl}_3$ . | 36 |
| <b>Fig S31:</b> $^1\text{H}$ NMR spectra of compound <b>3n</b> in $\text{CDCl}_3$ .    | 37 |
| <b>Fig S32:</b> $^{13}\text{C}$ NMR spectra of compound <b>3n</b> in $\text{CDCl}_3$ . | 38 |
| <b>Fig S33:</b> $^1\text{H}$ NMR spectra of compound <b>3o</b> in $\text{CDCl}_3$ .    | 39 |
| <b>Fig S34:</b> $^{13}\text{C}$ NMR spectra of compound <b>3o</b> in $\text{CDCl}_3$ . | 40 |
| <b>Fig S35:</b> $^1\text{H}$ NMR spectra of compound <b>3p</b> in $\text{CDCl}_3$ .    | 41 |
| <b>Fig S36:</b> $^{13}\text{C}$ NMR spectra of compound <b>3p</b> in $\text{CDCl}_3$ . | 42 |
| <b>Fig S37:</b> $^1\text{H}$ NMR spectra of compound <b>3q</b> in $\text{CDCl}_3$ .    | 43 |
| <b>Fig S38:</b> $^{13}\text{C}$ NMR spectra of compound <b>3q</b> in $\text{CDCl}_3$ . | 44 |
| <b>Fig S39:</b> $^1\text{H}$ NMR spectra of compound <b>3r</b> in $\text{CDCl}_3$ .    | 45 |
| <b>Fig S40:</b> $^{13}\text{C}$ NMR spectra of compound <b>3r</b> in $\text{CDCl}_3$ . | 46 |
| <b>Fig S41:</b> HRMS of compound <b>3r</b> .                                           | 47 |
| <b>Fig S42:</b> $^1\text{H}$ NMR spectra of compound <b>3s</b> in $\text{CDCl}_3$ .    | 48 |
| <b>Fig S43:</b> $^{13}\text{C}$ NMR spectra of compound <b>3s</b> in $\text{CDCl}_3$ . | 49 |
| <b>Fig S44:</b> $^1\text{H}$ NMR spectra of compound <b>3t</b> in $\text{CDCl}_3$ .    | 50 |
| <b>Fig S45:</b> $^{13}\text{C}$ NMR spectra of compound <b>3t</b> in $\text{CDCl}_3$ . | 51 |
| <b>Fig S46:</b> $^1\text{H}$ NMR spectra of compound <b>3u</b> in $\text{CDCl}_3$ .    | 52 |
| <b>Fig S47:</b> $^{13}\text{C}$ NMR spectra of compound <b>3u</b> in $\text{CDCl}_3$ . | 53 |

|                                                                                        |    |
|----------------------------------------------------------------------------------------|----|
| <b>Fig S48:</b> $^1\text{H}$ NMR spectra of compound <b>3v</b> in $\text{CDCl}_3$ .    | 54 |
| <b>Fig S49:</b> $^{13}\text{C}$ NMR spectra of compound <b>3v</b> in $\text{CDCl}_3$ . | 55 |
| <b>Fig S50:</b> HRMS of compound <b>3v</b> $[\text{M}+\text{Na}]^+$ .                  | 56 |
| References                                                                             | 57 |

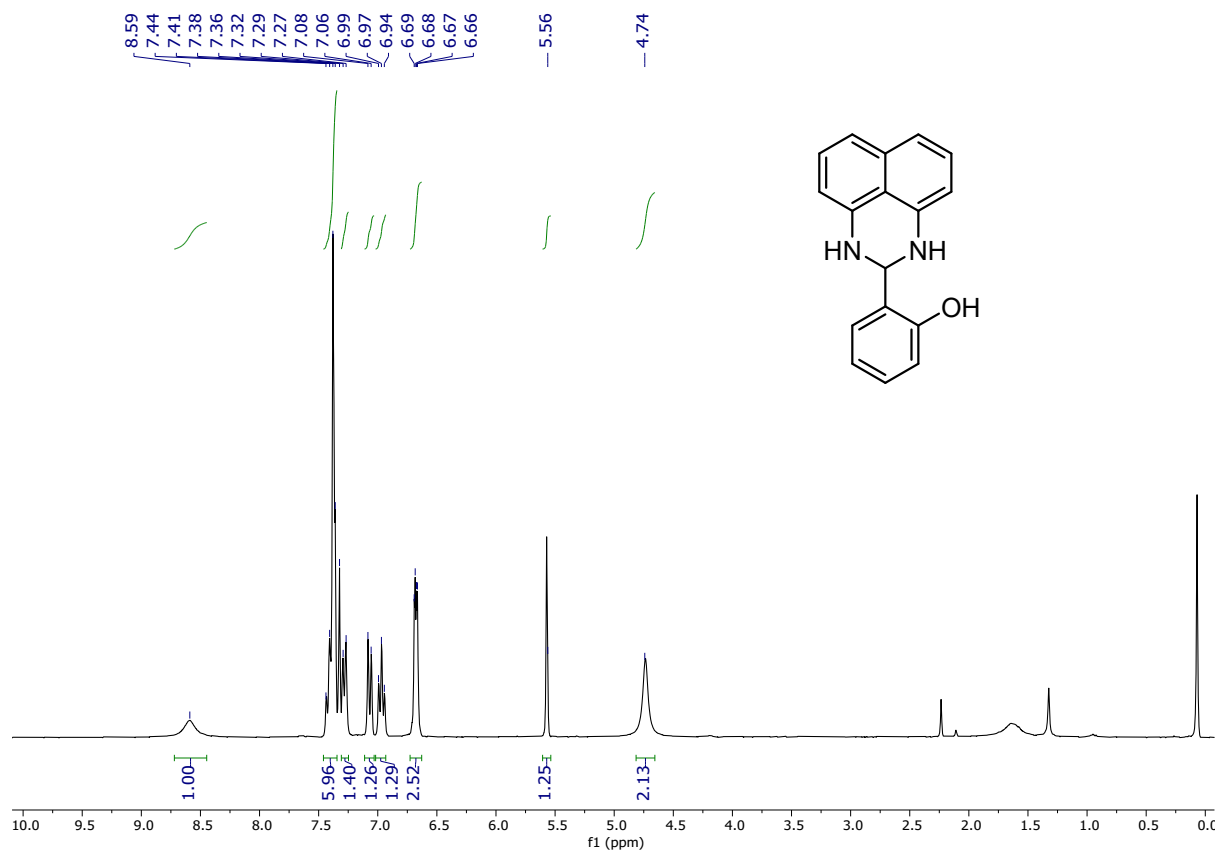

**Fig S1:** <sup>1</sup>H NMR spectra of ligand L1 in CDCl<sub>3</sub>.

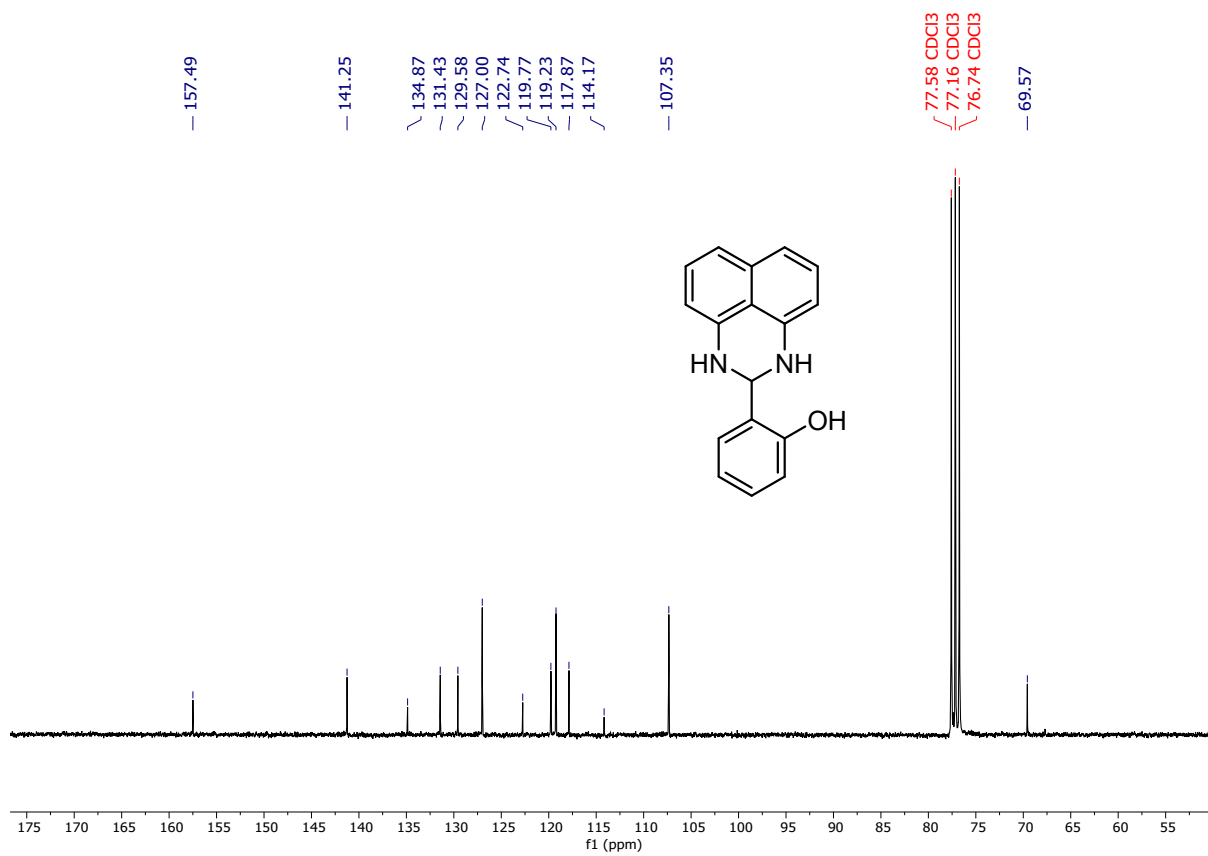

**Fig S2:**  $^{13}\text{C}$  NMR spectra of ligand L1 in  $\text{CDCl}_3$ .

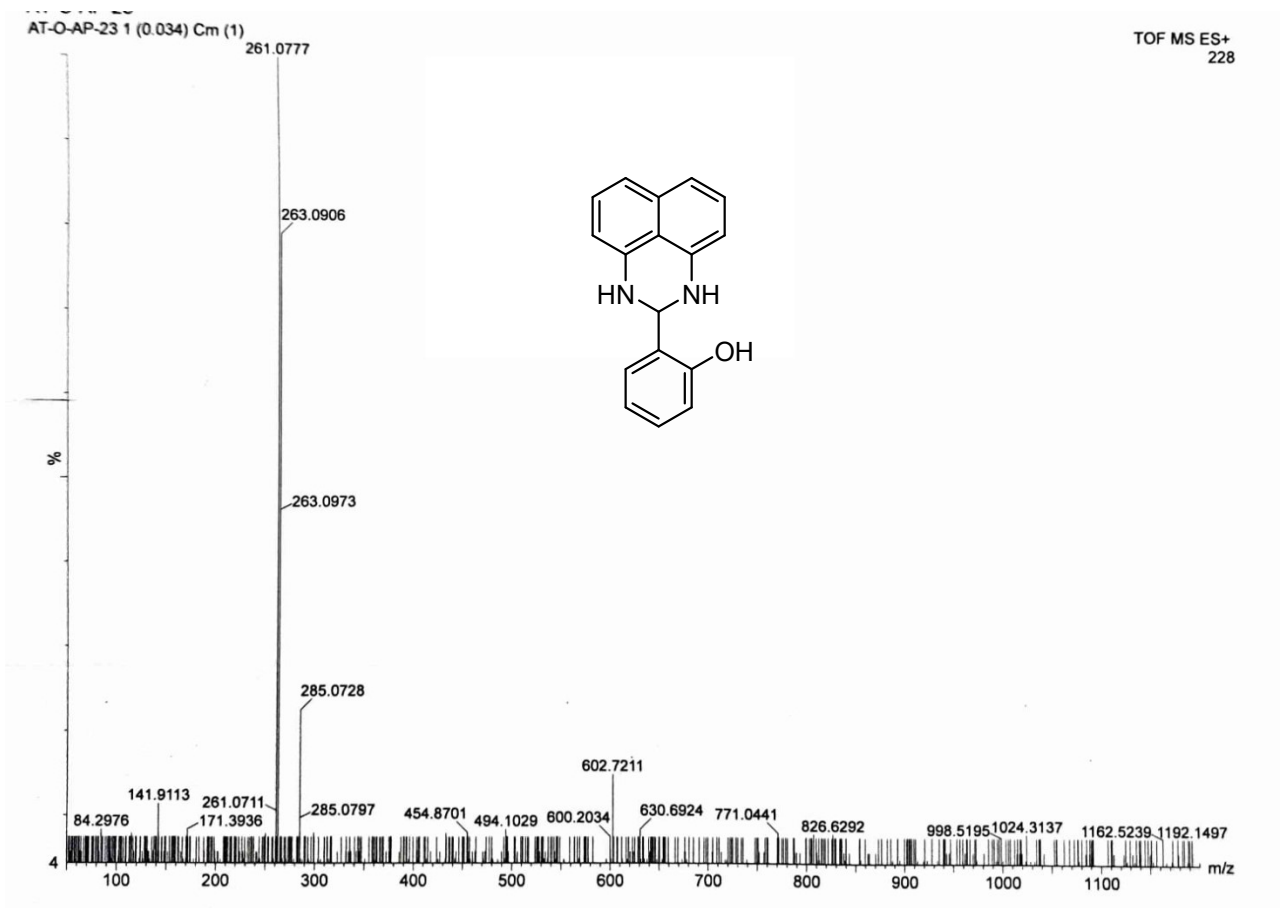

**Fig S3:** HRMS of ligand L1.

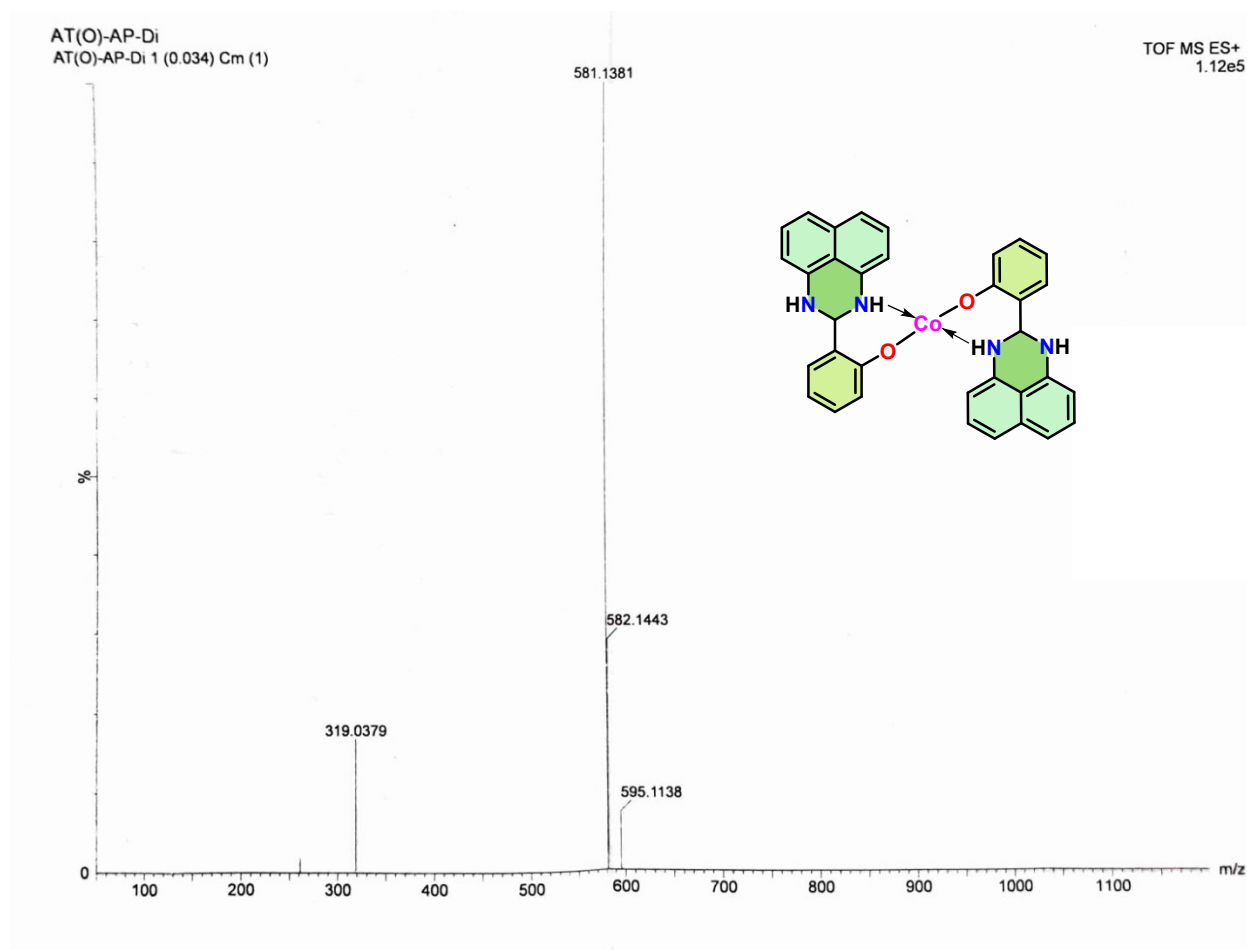

**Fig S4:** HRMS of complex **1**.

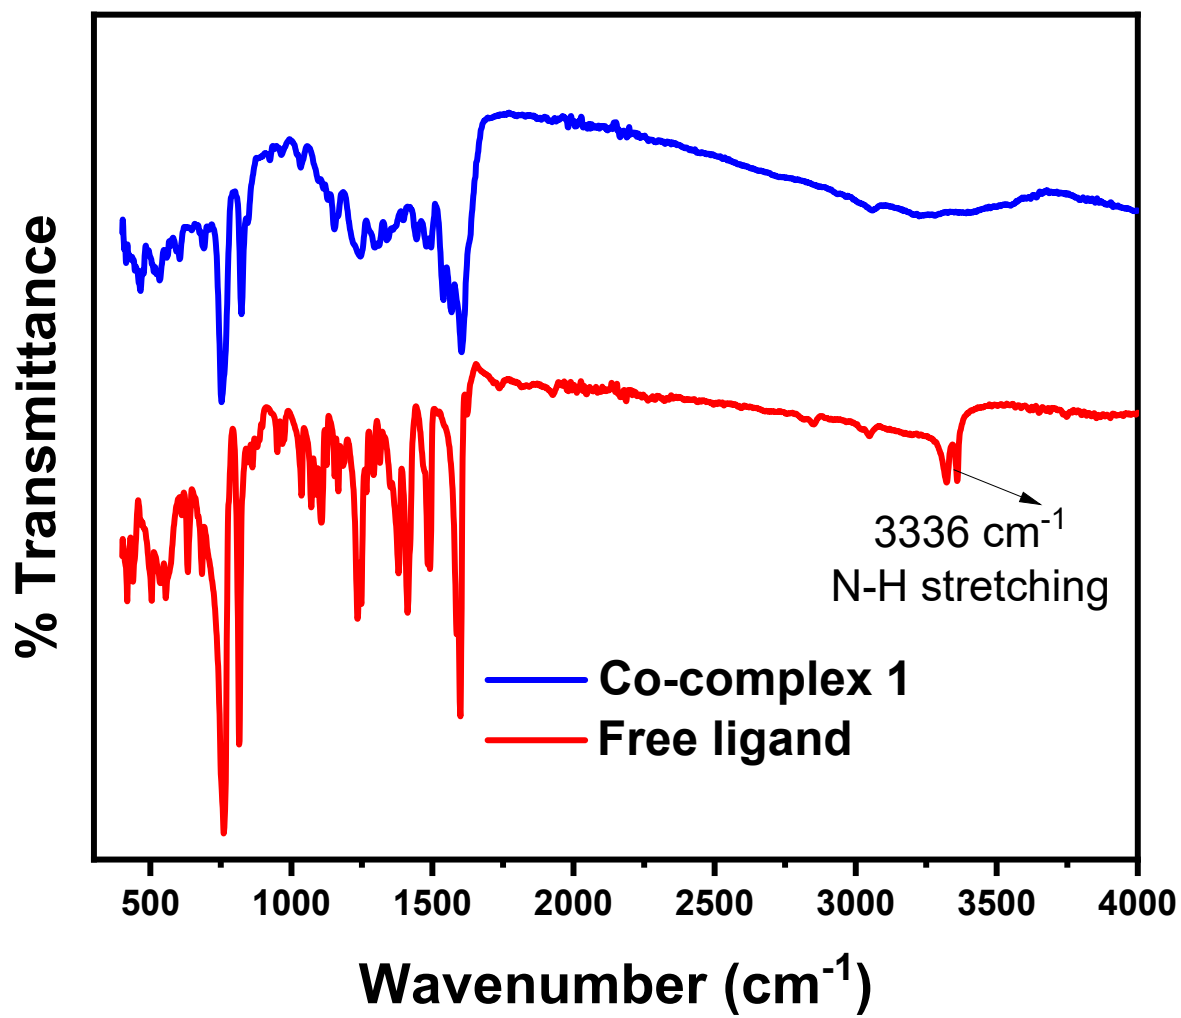

Fig S5: IR spectra of free ligand L1 and Co-complex 1 in solid state at 22 °C.



## Lithiation of compounds

All reactions have been performed under N<sub>2</sub> atmosphere through Schlenk line using *n*-BuLi as the lithiating agent. Reactions, where -78 °C is required, have been done using acetone/liq N<sub>2</sub> mixture.

1. 1,1'-biphenyl (**3a**): Compound **3a** has been prepared from iodobenzene in THF, according to literature reported procedure.<sup>1</sup>
2. [1,1'-biphenyl]-2,2'-diol (**3b**): Compound **3b** has been prepared from 2-bromophenol in diethyl ether, according to literature reported procedure.<sup>2</sup>
3. 4,4'-dimethyl-1,1'-biphenyl (**3c**): Compound **3c** has been prepared from lithiation of 4-bromotoluene, according to literature reported procedure.<sup>3</sup>
4. 3,3'-dimethoxy-1,1'-biphenyl (**3d**): Compound **3d** have been prepared from 3-bromoanisole by slight modification of literature reported procedure.<sup>4</sup> One equivalent of *n*-BuLi (0.213 ml, 2.5 M in hexane) was added to THF solution 3-bromoanisole (100 mg, 0.534 mmol) at -78 °C and stirred at the same temperature for 30 min, during which time colourless precipitate could be observed.
5. 4,4'-dimethoxy-1,1'-biphenyl (**3e**): Compound **3e** have been prepared from 4-bromoanisole by slight modification of literature reported procedure.<sup>5</sup> One equivalent of *n*-BuLi (0.213 ml, 2.5 M in hexane) was added to THF solution 4-bromoanisole (100 mg, 0.534 mmol) at room temperature and stirred at the same temperature for 2 h, during which time colourless precipitate could be observed.
6. 6,6'-difluoro-[1,1'-biphenyl]-3,3'-diol (**3f**): The same procedure as for **3b** was followed.
7. 3,3',5,5'-tetramethoxy-1,1'-biphenyl (**3g**): Compound **3g** has been prepared from lithiation of 3,5-dimethoxy-1-bromobenzene, according to literature reported procedure.<sup>6</sup>
8. 1,1'-bipyrene (**3h**): Compound **3h** has been prepared from 2-bromopyrene in THF, according to literature reported procedure.<sup>7</sup>
9. 2,2'-dimethyl-1,1'-binaphthalene (**3i**): Compound **3i** has been prepared from lithiation of 1-bromo-2-methyl-naphthalene, according to literature reported procedure.<sup>8</sup>
10. 2,2',6,6'-tetramethyl-1,1'-biphenyl (**3j**): Compound **3j** has been prepared from lithiation of 1,3-dimethyl-2-bromobenzene, according to literature reported procedure.<sup>9</sup>
11. 2,2'-bipyridine (**3k**): Compound **3k** has been prepared from lithiation of 2-bromopyridine, according to literature reported procedure.<sup>10</sup>

12. 1,1'-dimethyl-1*H*,1'*H*-2,2'-bibenzo[d]imidazole (**3l**): Compound **3l** has been prepared from lithiation of 1-methylbenzimidazole, by slight modification of literature reported procedure.<sup>11</sup> n-BuLi (1 equivalent, 0.6 ml, 2.5 M in hexane) was added dropwise to a solution of 1-methylbenzimidazole in THF at -78 °C and the mixture was stirred for 2 h at -78 °C, after which, the temperature of the reaction mixture was allowed to rise to room temperature within another 1 h.
13. 2,2'-bibenzo[d]thiazole (**3m**): Compound **3m** has been prepared from lithiation of benzothiazole, according to literature reported procedure.<sup>12</sup>
14. 1,1'-dimethyl-1*H*,1'*H*-2,2'-biindole (**3n**): Compound **3n** has been prepared from lithiation of 1-methylindole, according to literature reported procedure.<sup>13</sup>
15. 5,5'-dimethyl-2,2'-bithiophene (**3o**): Compound **3o** has been prepared from lithiation of 2-methylthiophene, according to literature reported procedure.<sup>14</sup>
16. Biferrocene (**3p**): Compound **3p** has been prepared from lithiation of ferrocene, according to literature reported procedure.<sup>15</sup>
17. 1,1'-dimethyl-1*H*,1'*H*-2,2'-biimidazole (**3q**): Compound **3q** has been prepared from lithiation of 1-methylimidazole, according to literature reported procedure.<sup>16</sup>
18. 5-bromo-4,5'-bipyrimidine (**3r**): Compound **3r** has been prepared from 5-bromopyrimidine in THF, according to literature reported procedure.<sup>17</sup>
19. 5,5'-dibromo-2,2'-bipyridine (**3s**): Compound **3s** has been prepared from 3-bromopyridine in diethyl ether, according to procedure reported in patent.<sup>18</sup>
20. 3-bromo-1,1':3',1''-terphenyl (**3t**) and 3,3'''-dibromo-1,1':3',1'':3'',1'''-quaterphenyl (**3u**): Compounds **3t** and **3u** have been prepared by the lithiation of 1,3-dibromobenzene according to literature reported procedure.<sup>19</sup>
21. 1,1':3',1'':3'',1'''-quaterphenyl (**3v**): Compound **3v** has been prepared from lithiation of 1-iodo-3-bromobenzene, according to literature reported procedure.<sup>20</sup>

**Table S1.** Optimization of reaction conditions for the dimerization of heteroarenes.

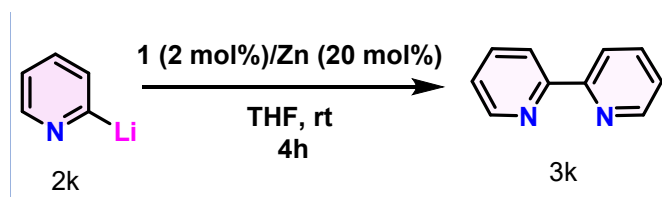

| Entry | Catalyst (mol %) <sup>a</sup> | Zn source (equiv) | Temperature (°C) | Time (h) | % Yield <sup>b</sup> |
|-------|-------------------------------|-------------------|------------------|----------|----------------------|
| 1     | Catalyst 1 (2)                | Zn dust (1)       | rt               | 2        | 55                   |
| 2     | Catalyst 1 (2)                | Zn dust (1)       | rt               | 3        | 68                   |
| 3     | Catalyst 1 (2)                | Zn dust (1)       | rt               | 4        | 75                   |
| 4     | -                             | Zn dust (1)       | rt               | 4        | NR                   |
| 5     | Catalyst 1 (2)                | -                 | rt               | 4        | NR                   |
| 6     | Catalyst 1 (2)                | Zn dust (1)       | 45               | 4        | 75                   |
| 7     | Catalyst 1 (2)                | Zn dust (1)       | 60               | 4        | 75                   |
| 8     | Catalyst 1 (2)                | Zn dust (20 mol%) | rt               | 2        | 55                   |
| 9     | Catalyst 1 (2)                | Zn dust (20 mol%) | rt               | 3        | 68                   |
| 10    | Catalyst 1 (2)                | Zn dust (20 mol%) | rt               | 4        | 75                   |

<sup>a</sup>Reaction conditions: **2k** (1 mmol), Zn dust, cobalt catalyst, solvent THF (5 ml).

<sup>b</sup>Isolated yield after column chromatography.

**Table S2.** Table for known and unknown compounds

| Known Compounds | Unknown compounds |
|-----------------|-------------------|
| <b>3a-3t</b>    | <b>3u, 3v</b>     |

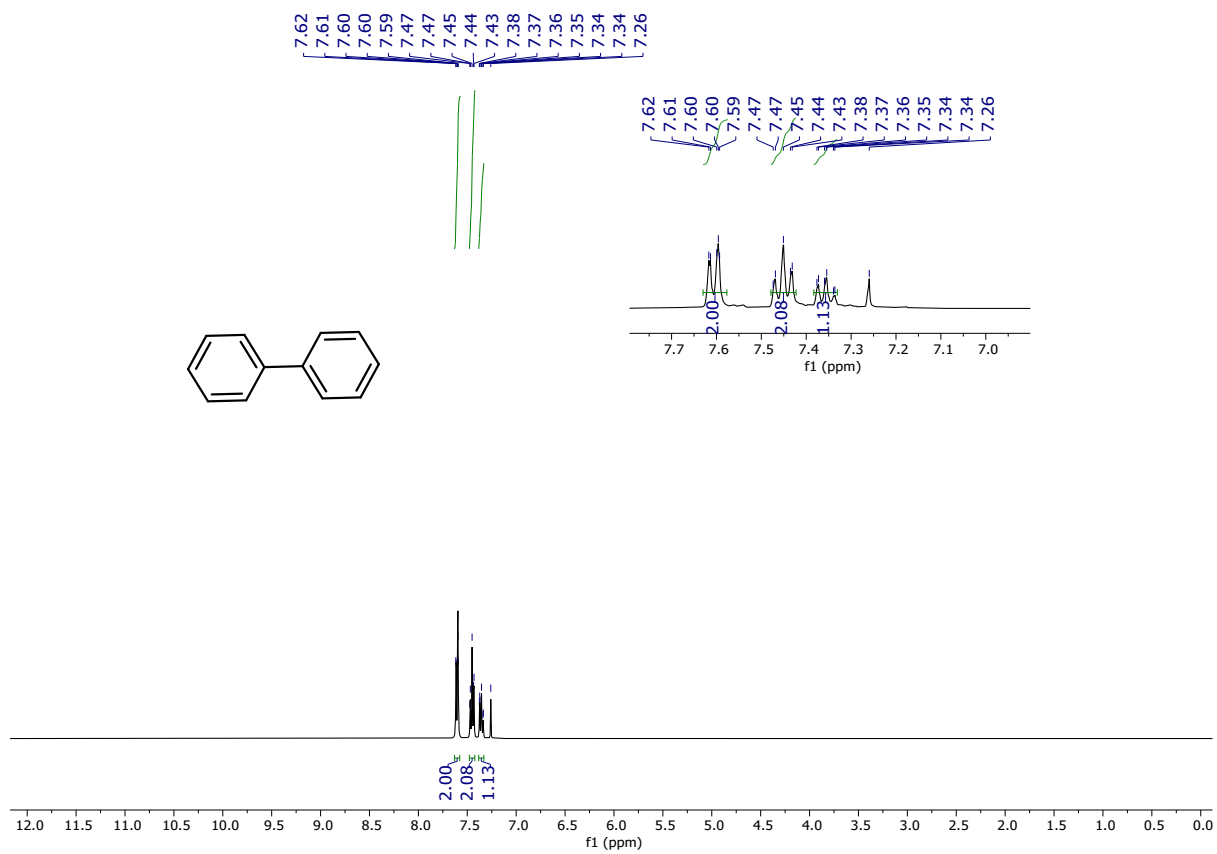

**Fig S6:**  $^1\text{H}$  NMR spectra of compound **3a** in  $\text{CDCl}_3$ .

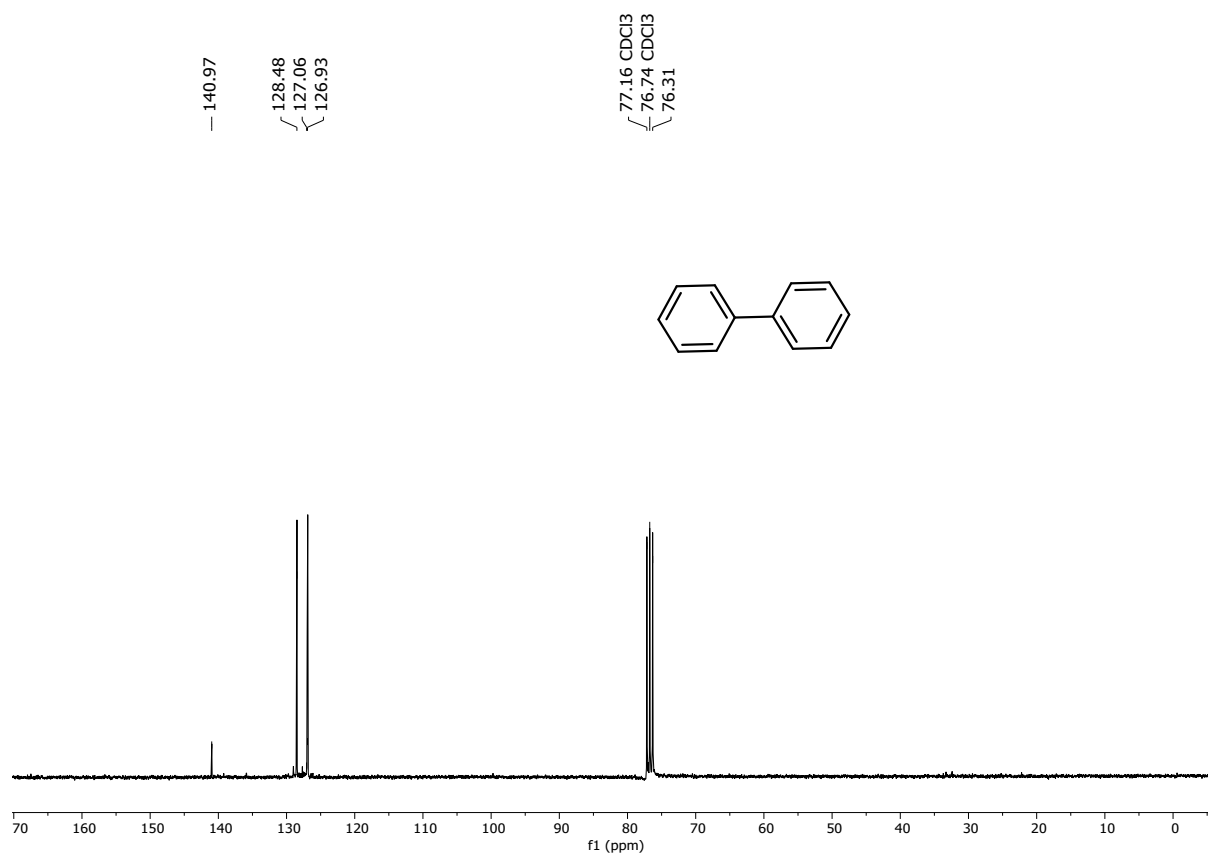

**Fig S7:**  $^{13}\text{C}$  NMR spectra of compound **3a** in  $\text{CDCl}_3$ .

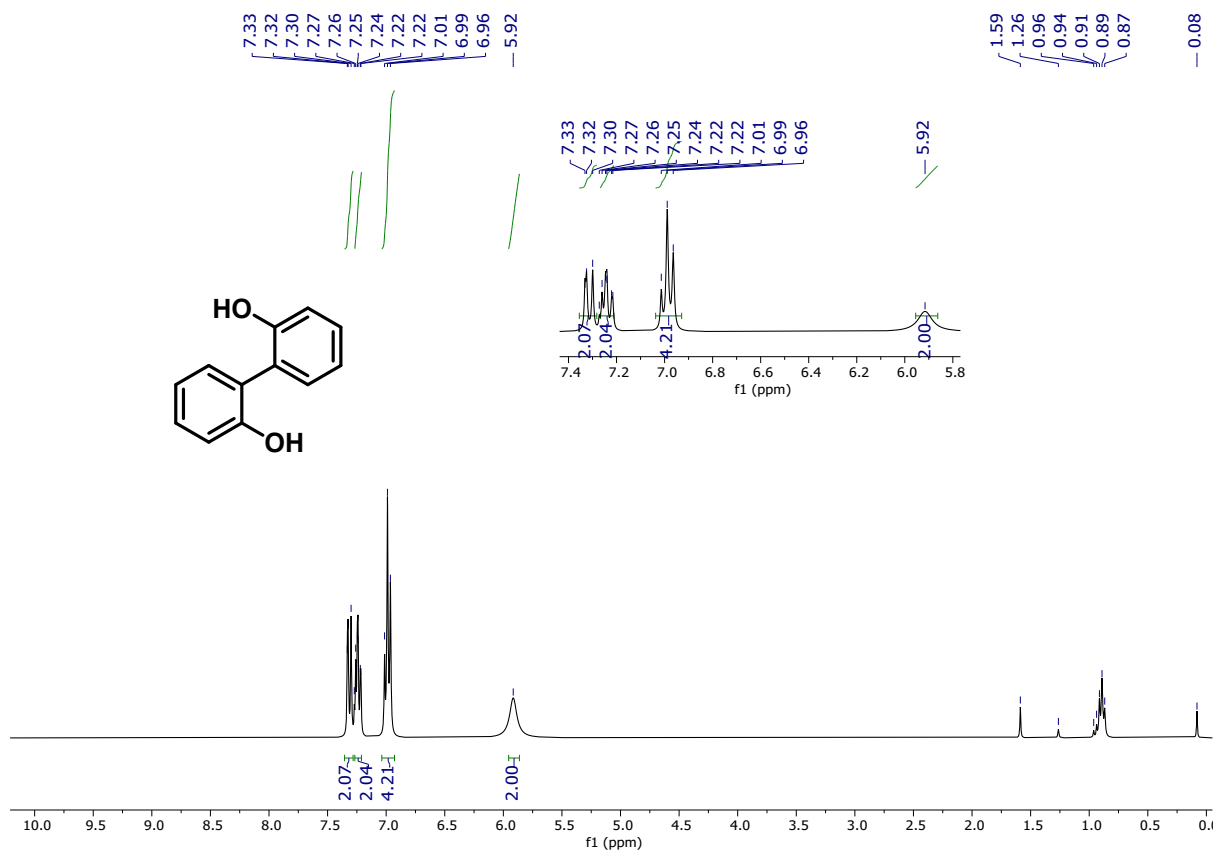

**Fig S8:**  $^1\text{H}$  NMR spectra of compound **3b** in  $\text{CDCl}_3$ .

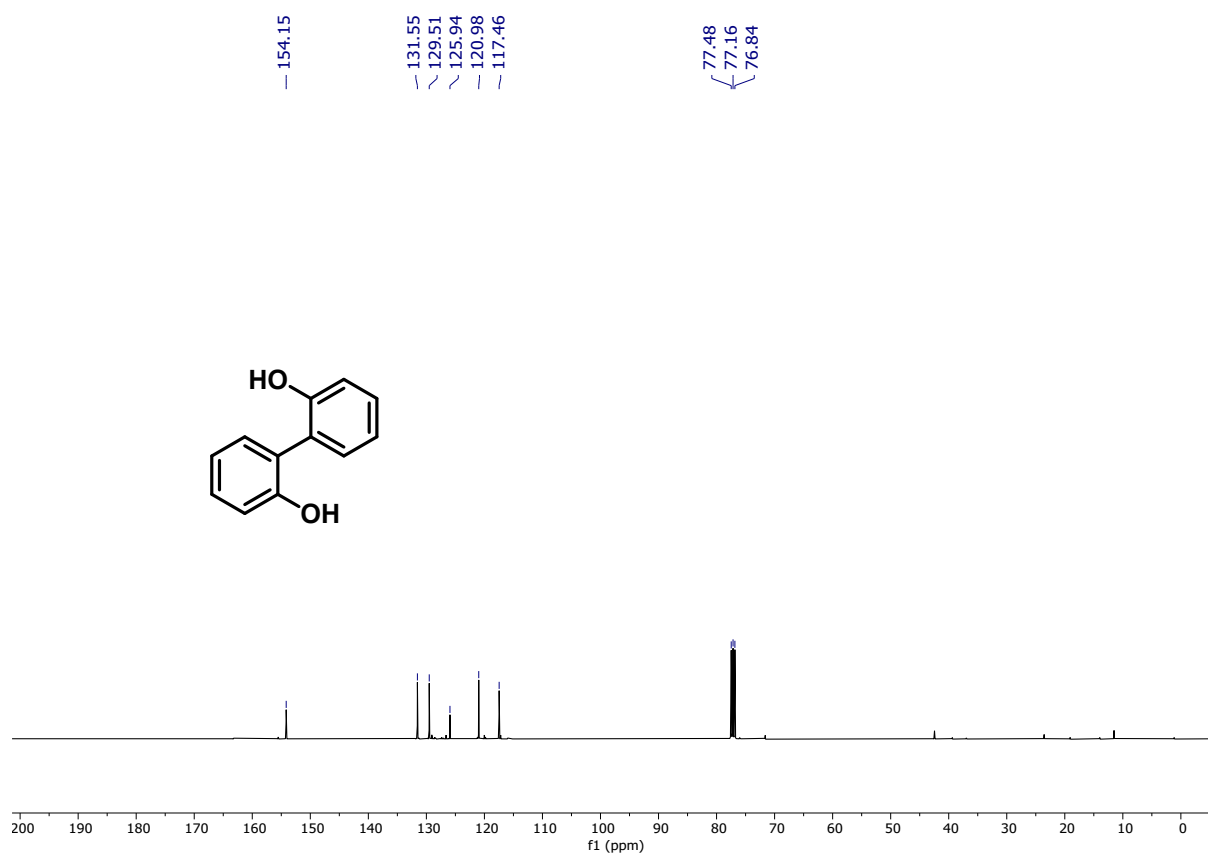

**Fig S9:**  $^{13}\text{C}$  NMR spectra of compound **3b** in  $\text{CDCl}_3$ .

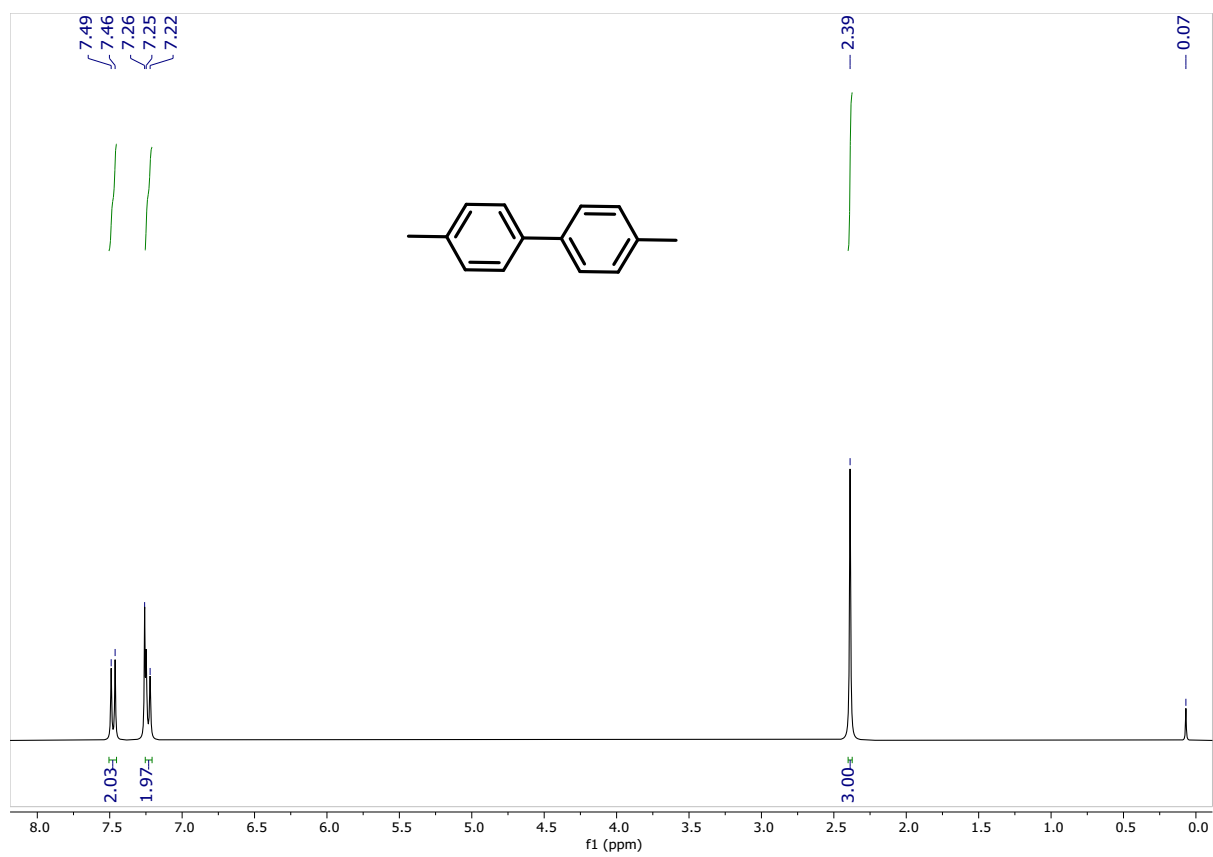

**Fig S10:**  $^1\text{H}$  NMR spectra of compound **3c** in  $\text{CDCl}_3$ .



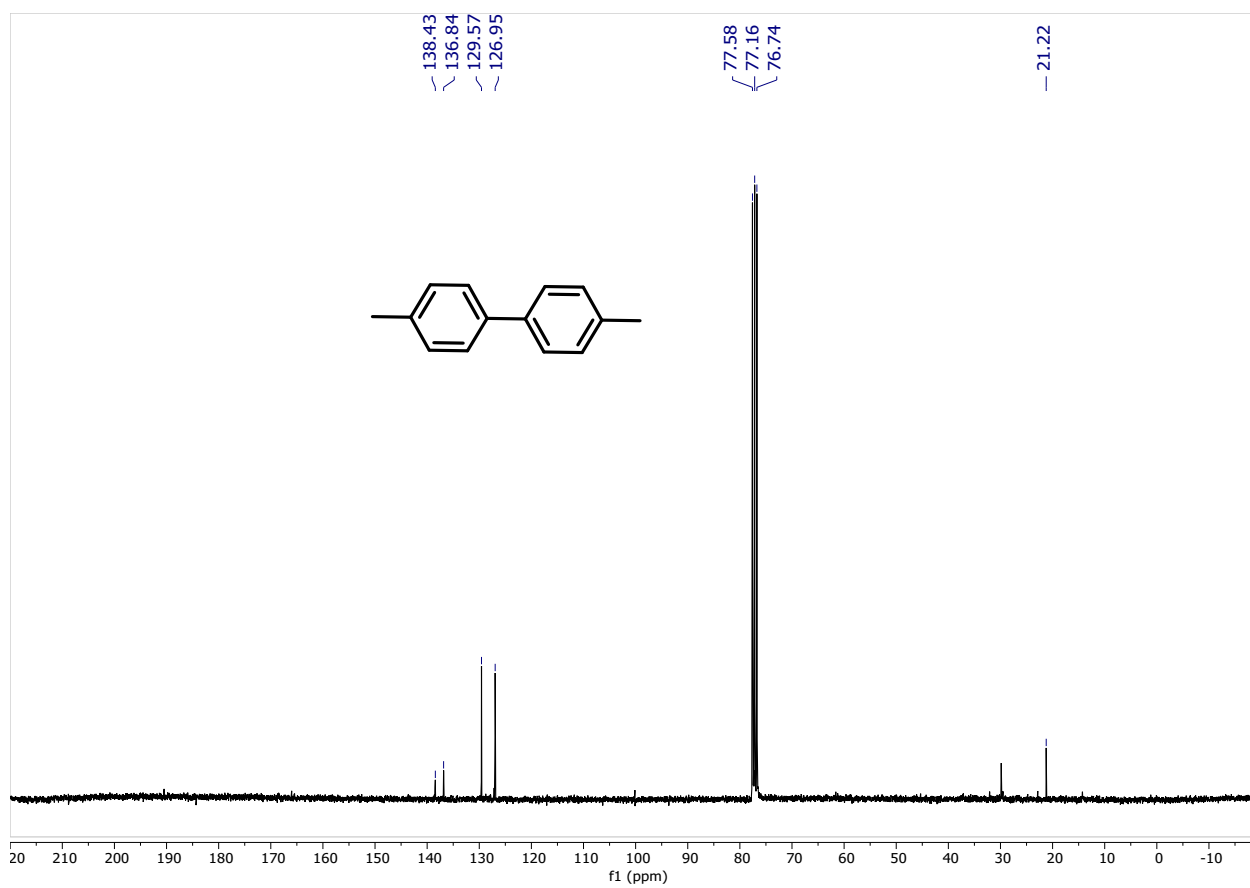

**Fig S11:**  $^{13}\text{C}$  NMR spectra of compound **3c** in  $\text{CDCl}_3$ .

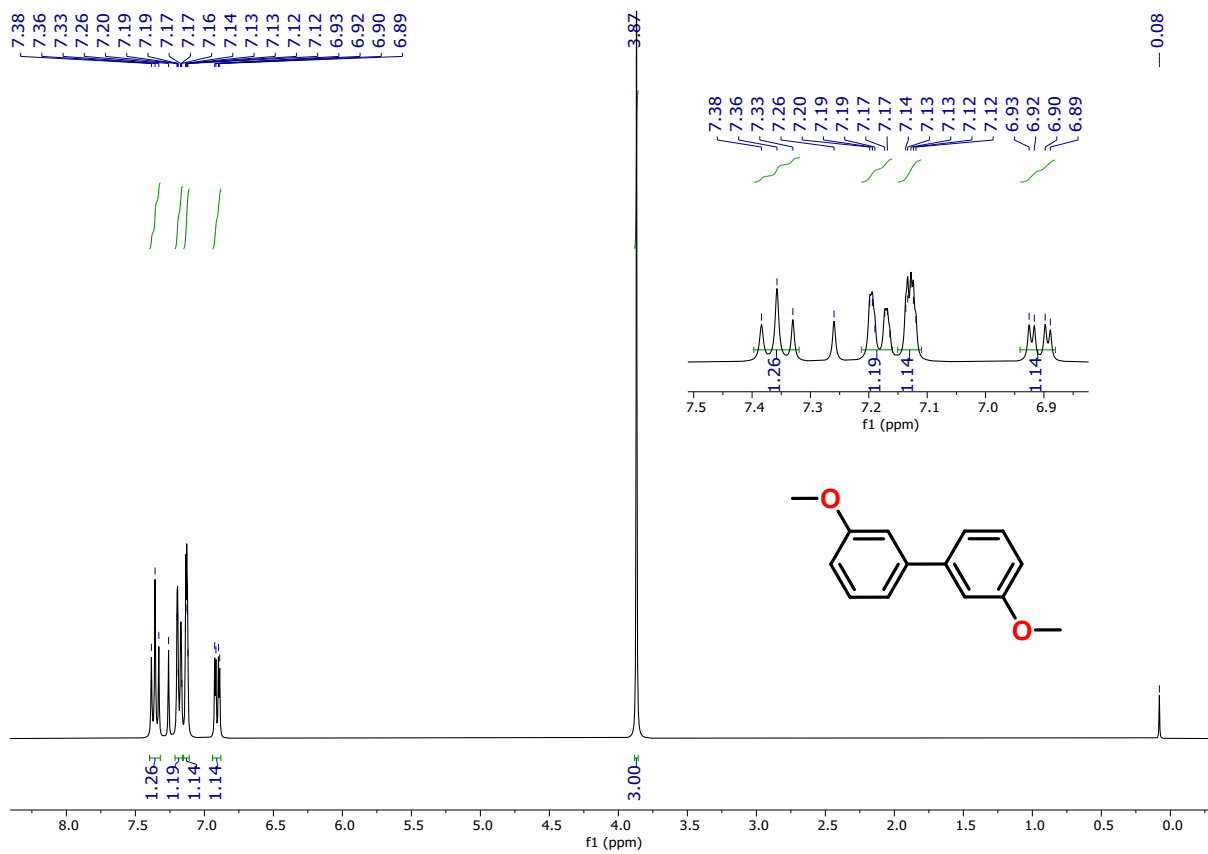

**Fig S12:**  $^1\text{H}$  NMR spectra of compound **3d** in  $\text{CDCl}_3$ .

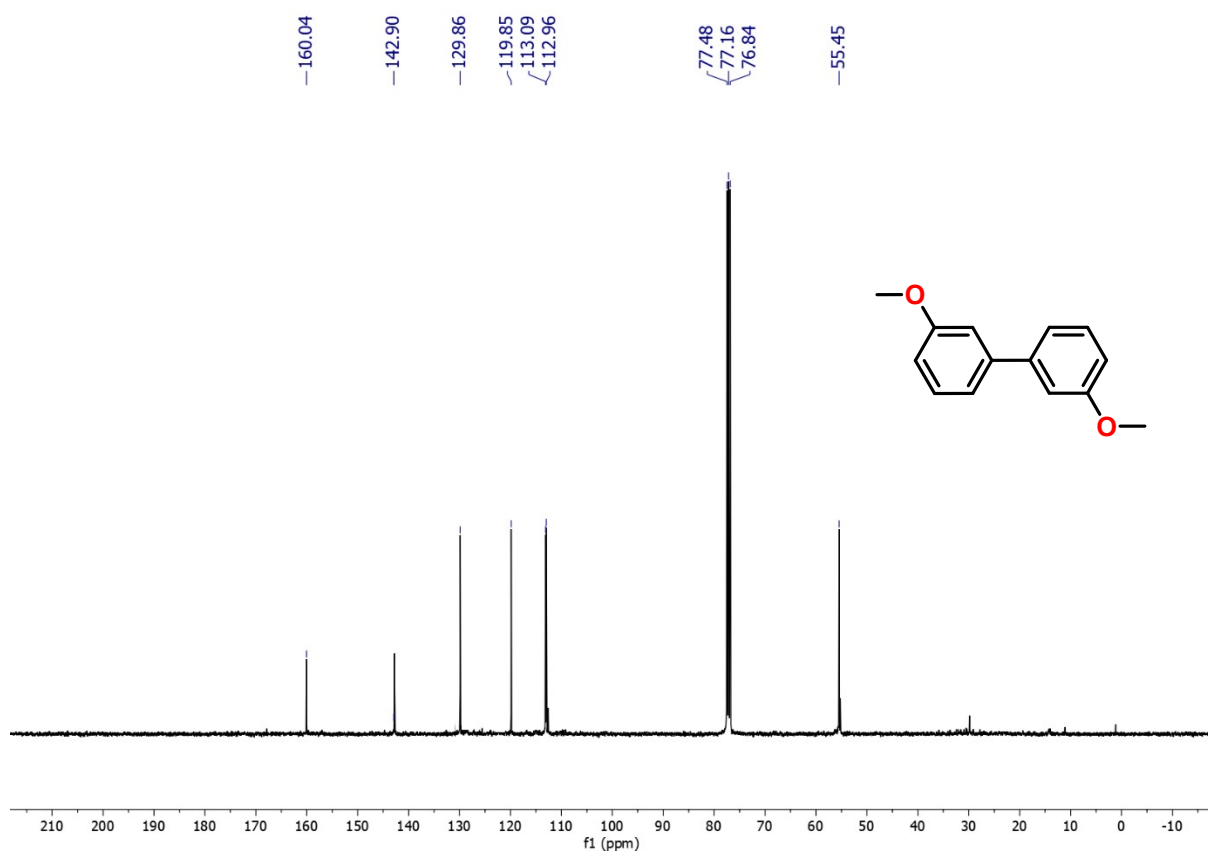

**Fig S13:**  $^{13}\text{C}$  NMR spectra of compound **3d** in  $\text{CDCl}_3$ .

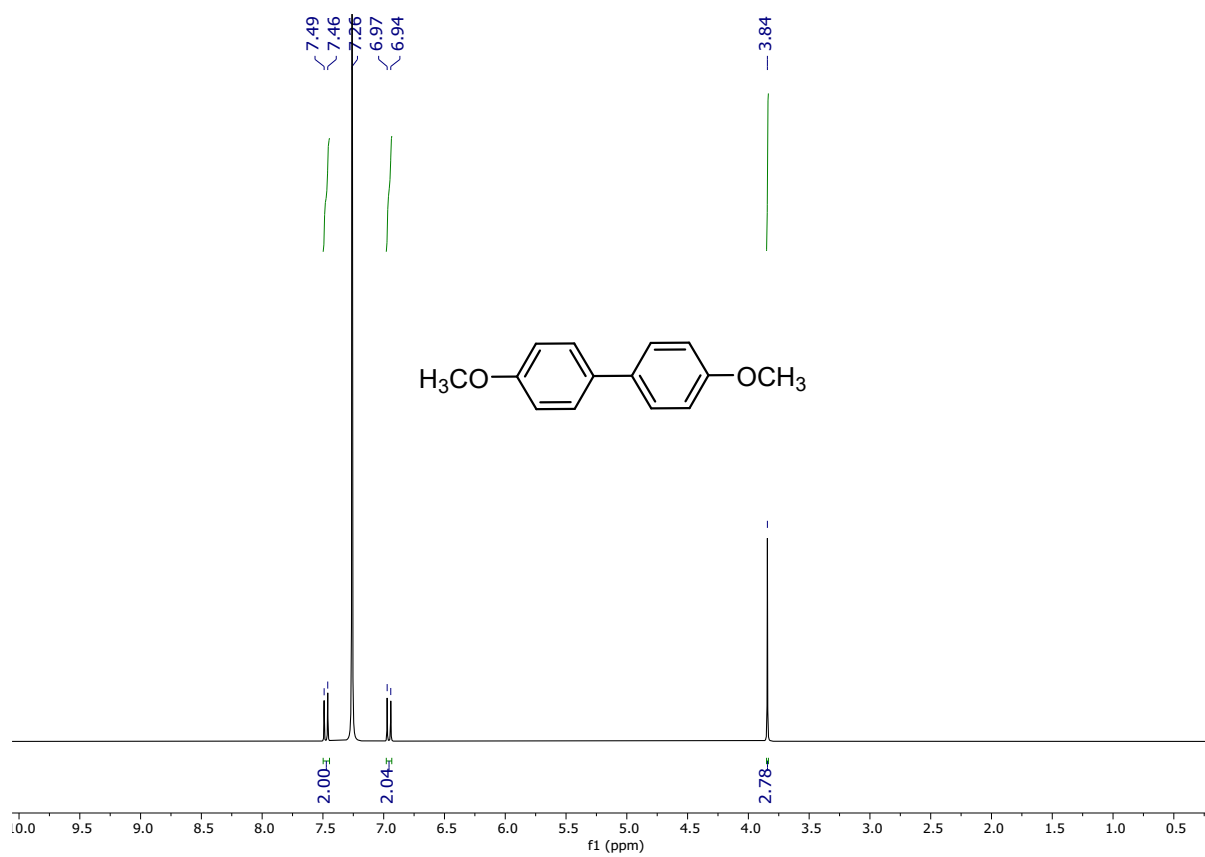

**Fig S14:**  $^1\text{H}$  NMR spectra of compound **3e** in  $\text{CDCl}_3$ .

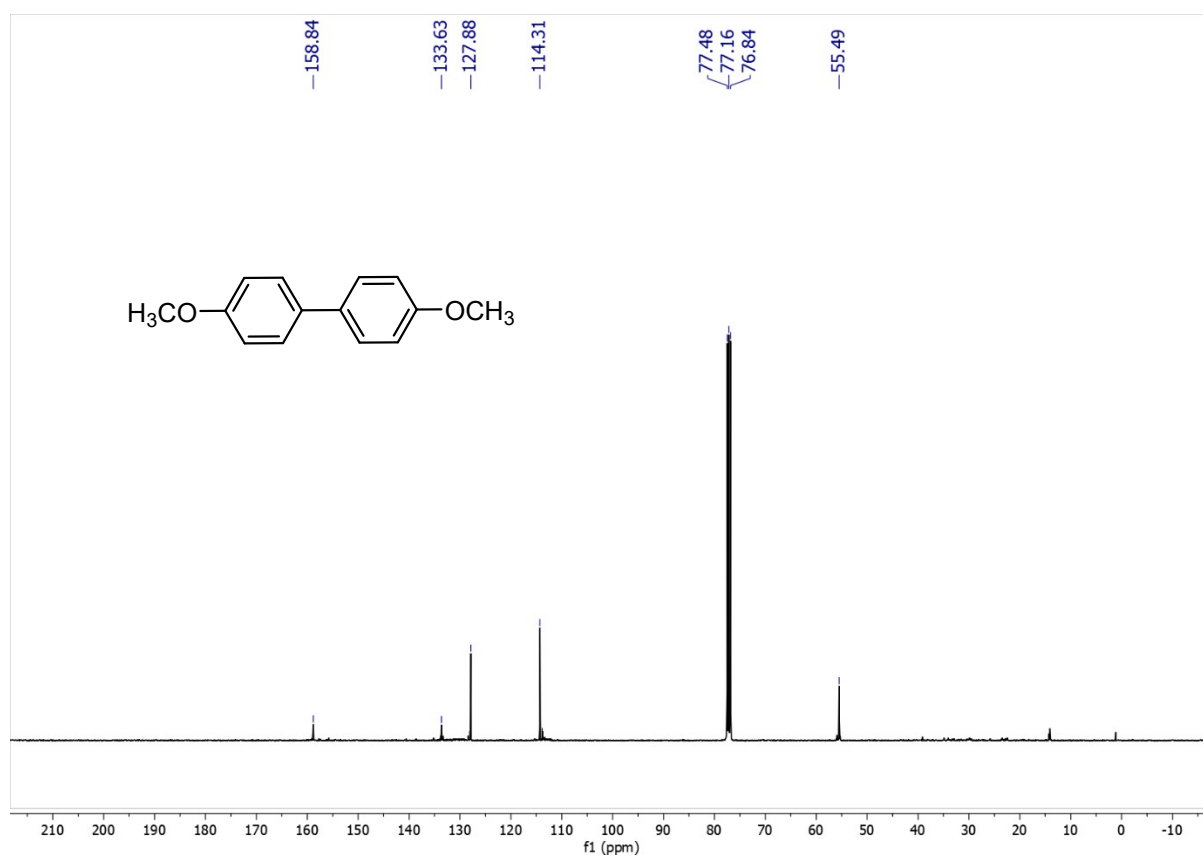

**Fig S15:**  $^{13}\text{C}$  NMR spectra of compound **3e** in  $\text{CDCl}_3$ .

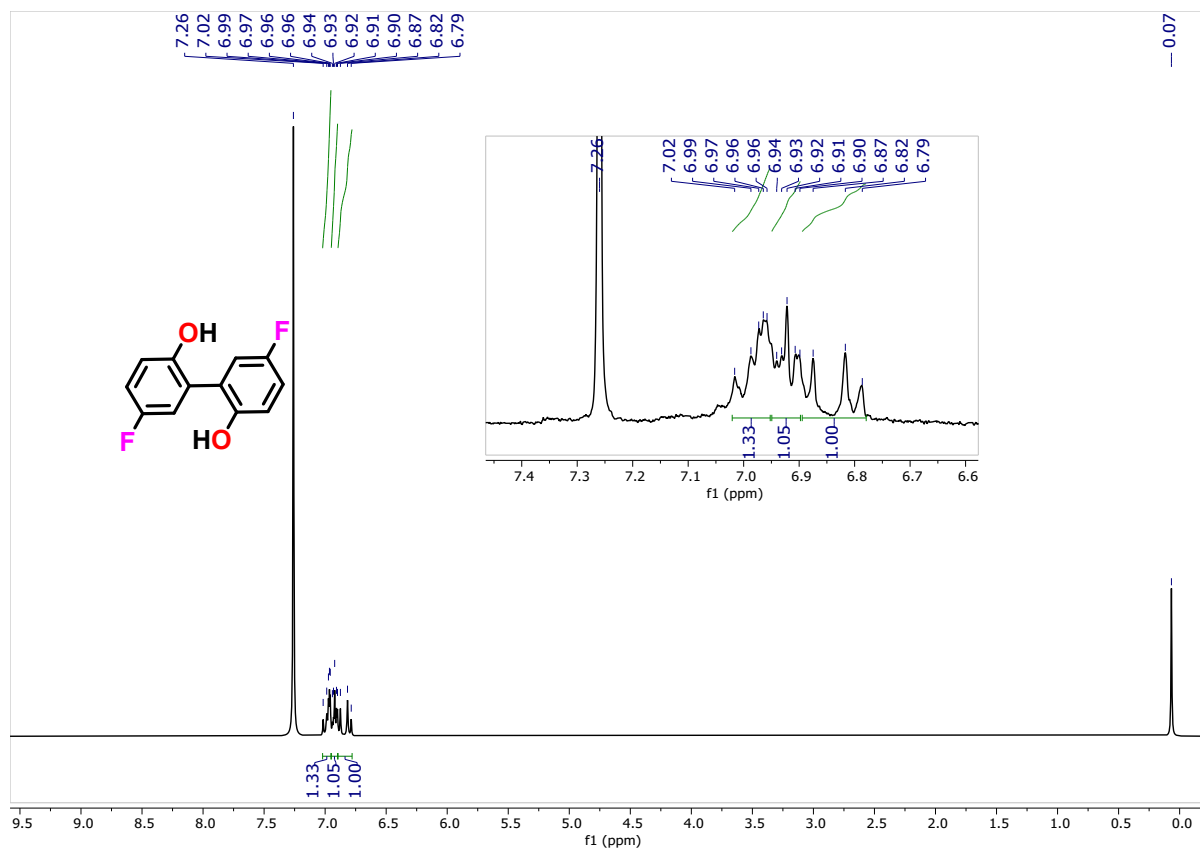

**Fig S16:**  $^1\text{H}$  NMR spectra of compound **3f** in  $\text{CDCl}_3$ .

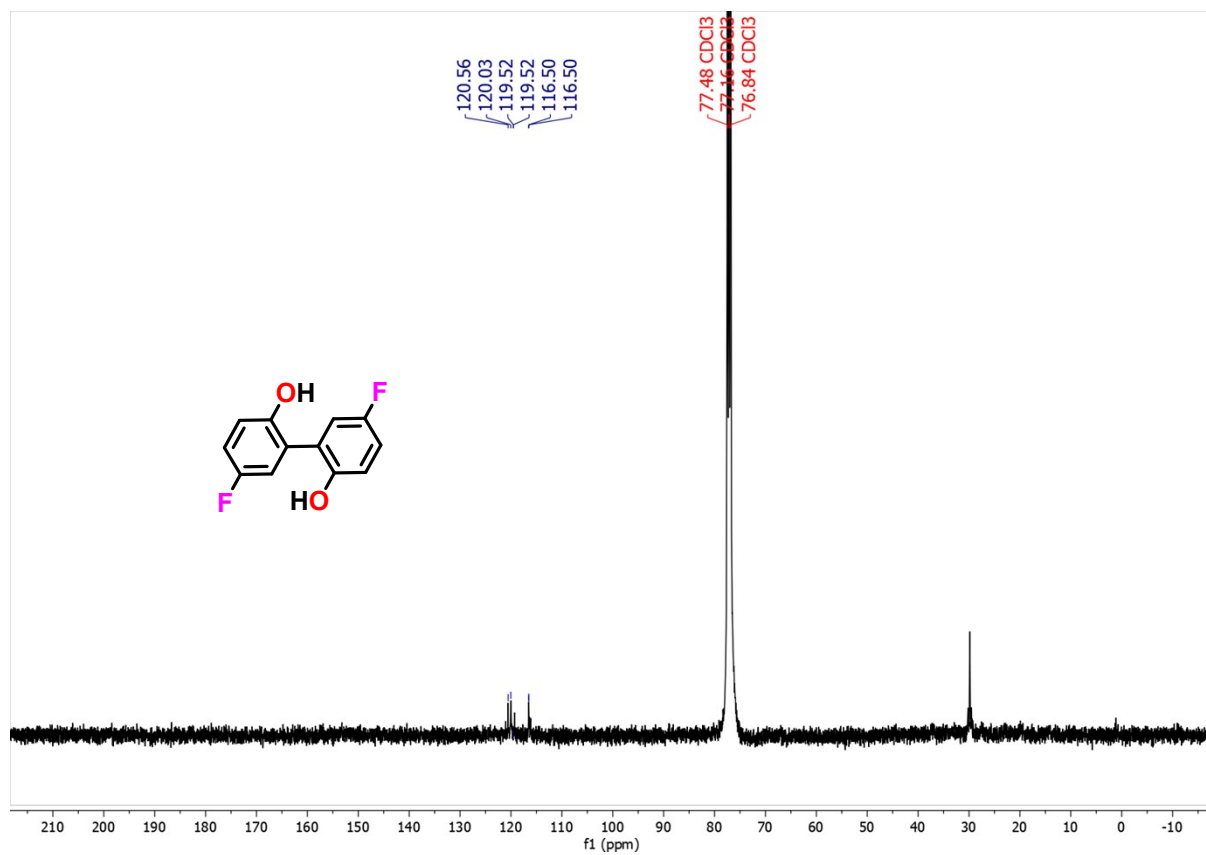

**Fig S17:**  $^{13}\text{C}$  NMR spectra of compound **3f** in  $\text{CDCl}_3$ .

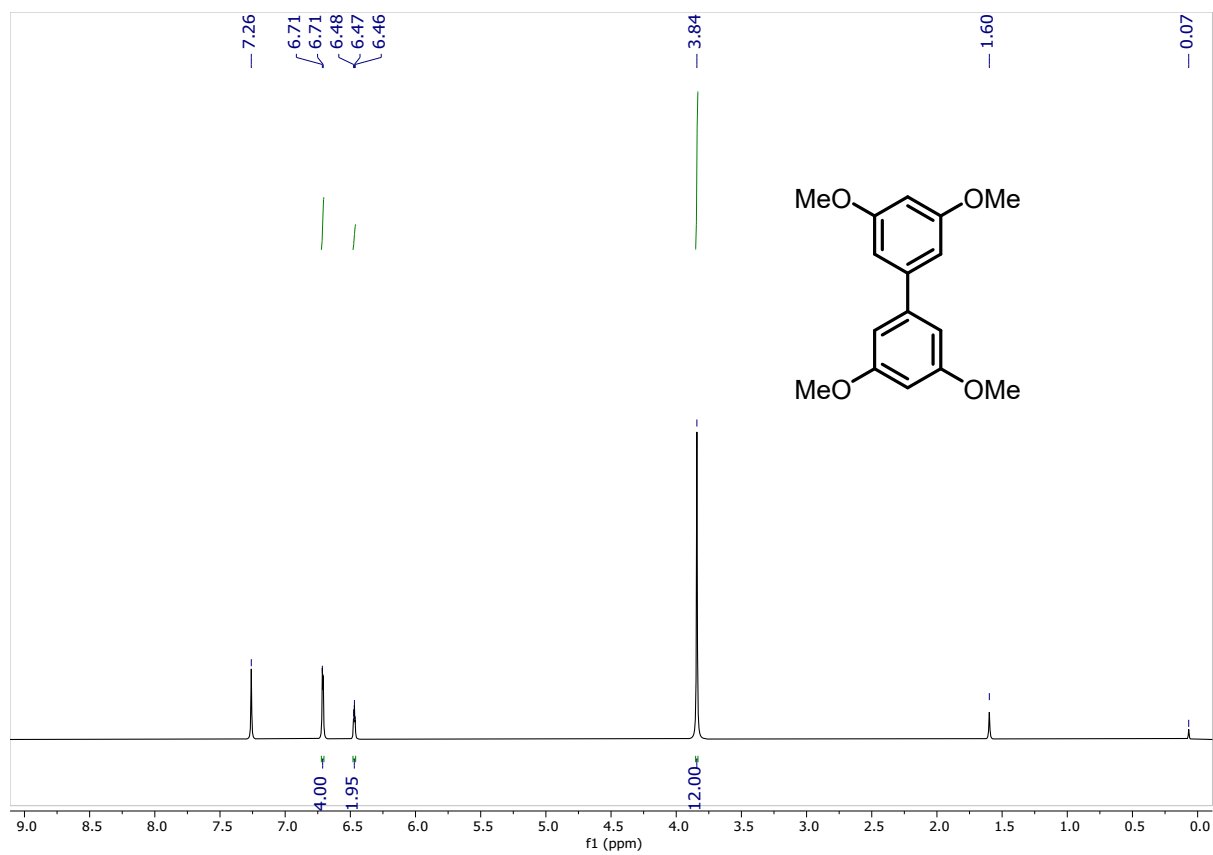

**Fig S18:** <sup>1</sup>H NMR spectra of compound **3g** in CDCl<sub>3</sub>.



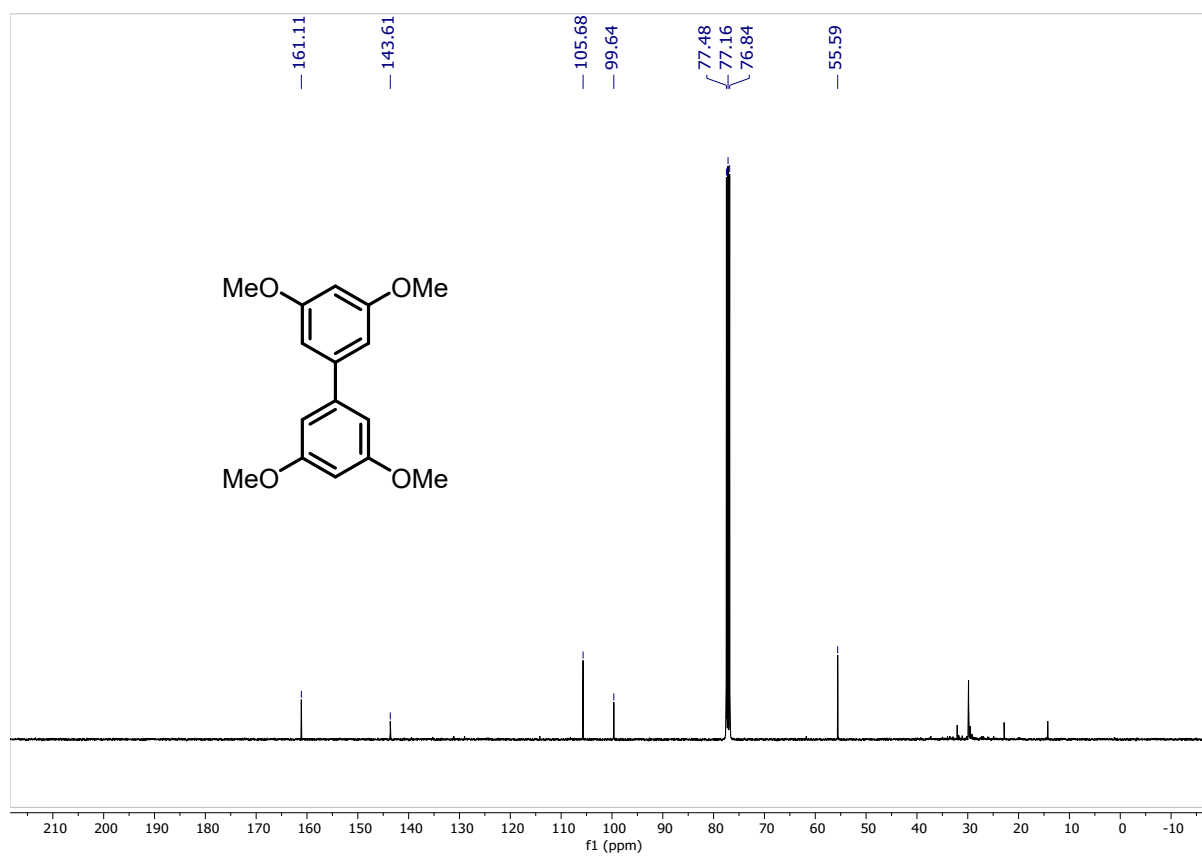

**Fig S19:**  $^{13}\text{C}$  NMR spectra of compound **3g** in  $\text{CDCl}_3$ .

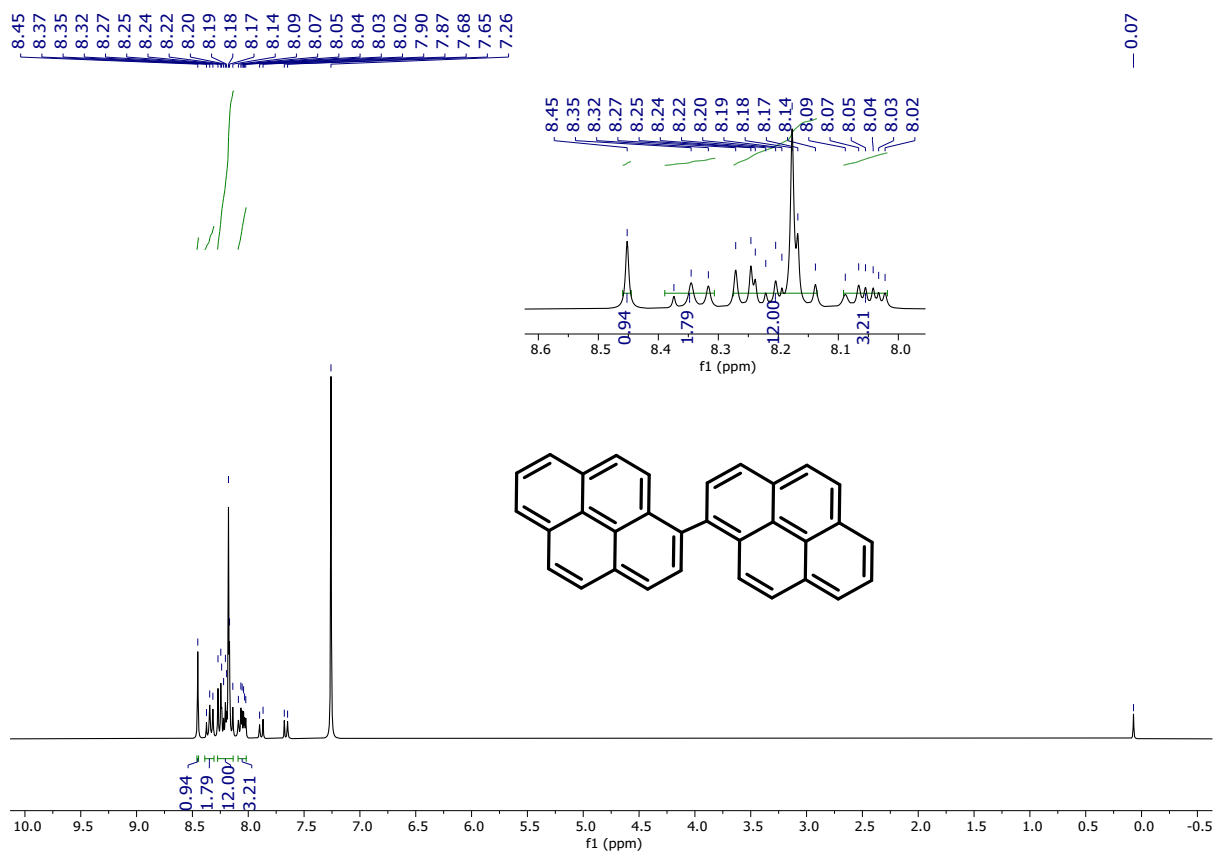

**Fig S20:** <sup>1</sup>H NMR spectra of compound **3h** in CDCl<sub>3</sub>.

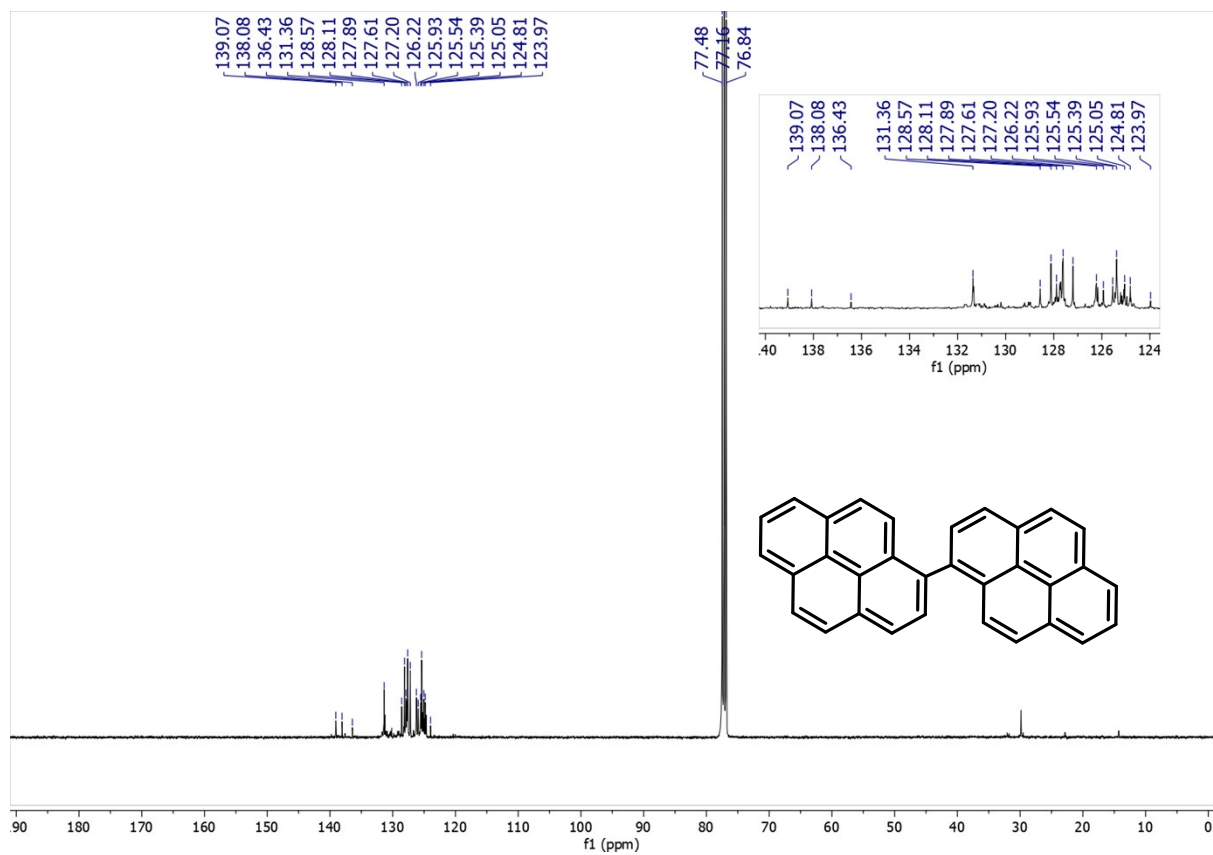

**Fig S21:**  $^{13}\text{C}$  NMR spectra of compound **3h** in  $\text{CDCl}_3$ .

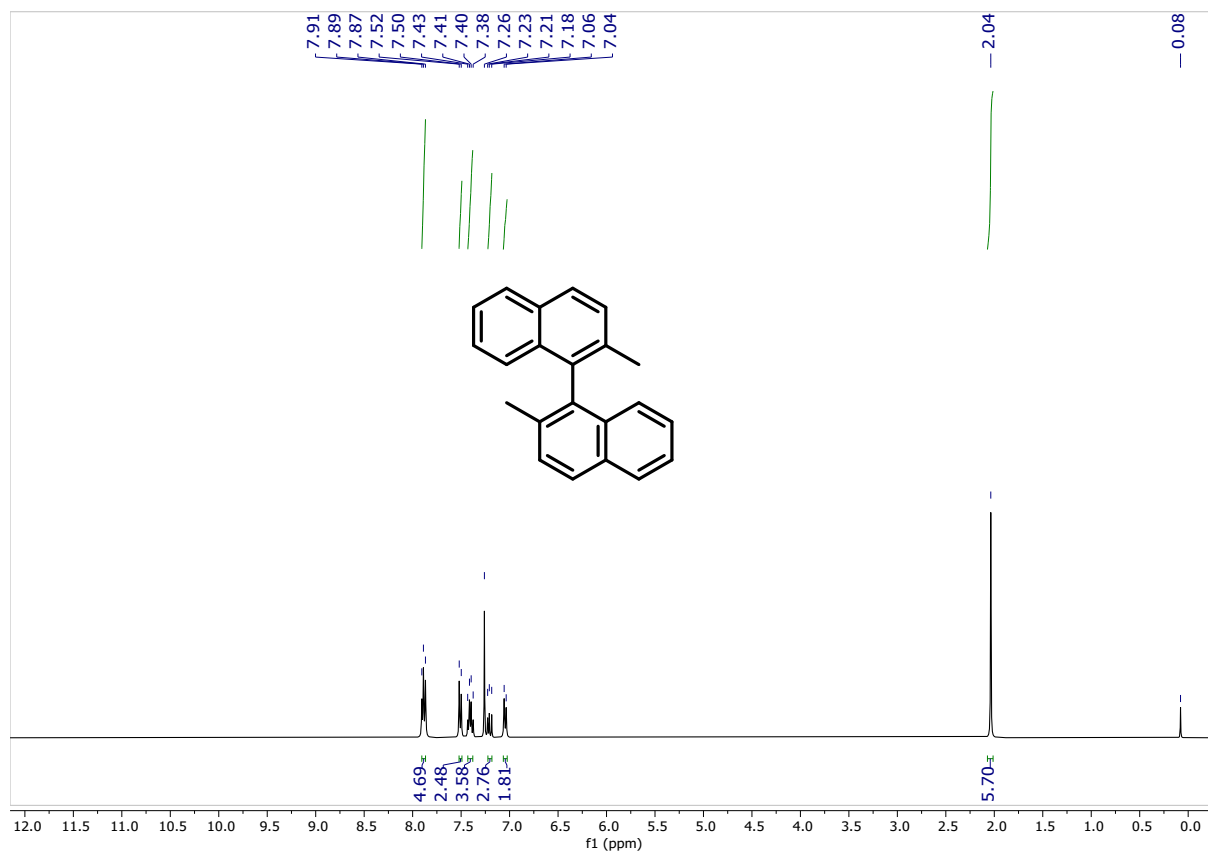

**Fig S22:** <sup>1</sup>H NMR spectra of compound **3i** in CDCl<sub>3</sub>.

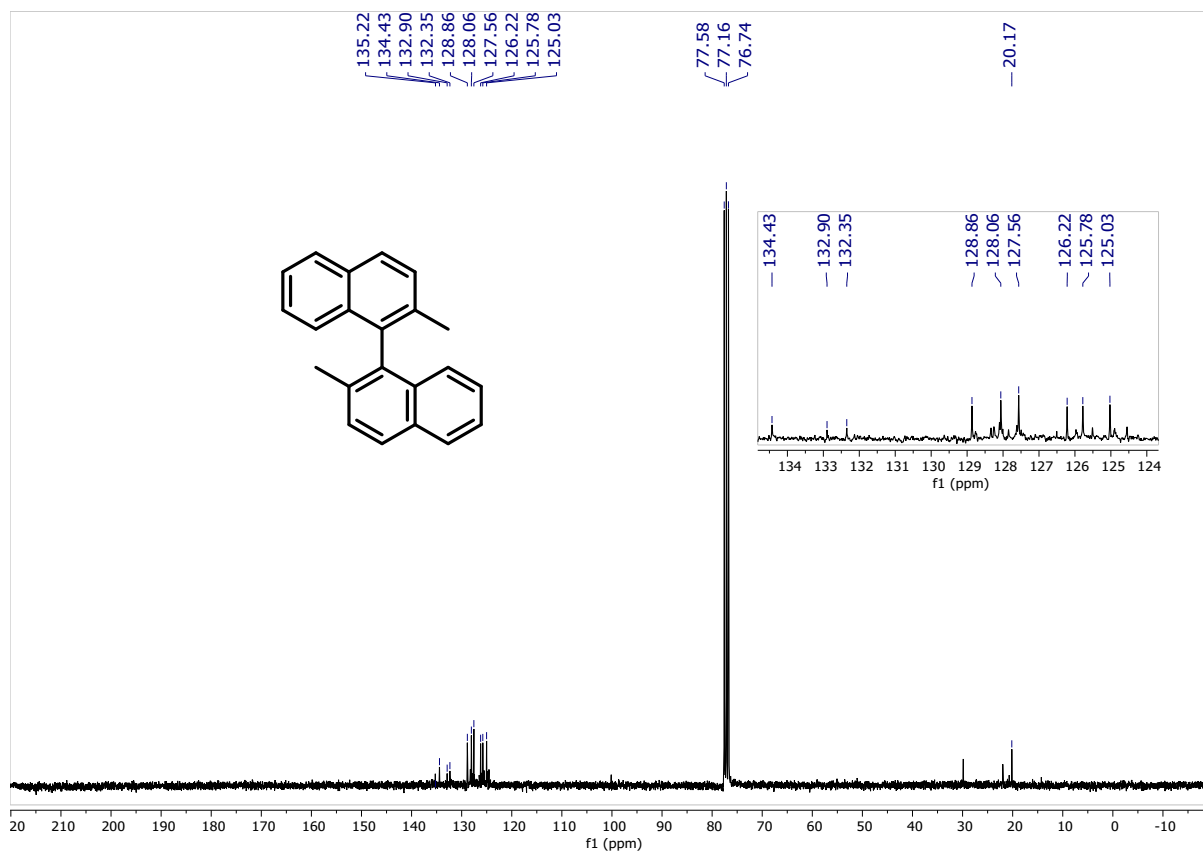

**Fig S23:**  $^{13}\text{C}$  NMR spectra of compound **3i** in  $\text{CDCl}_3$ .

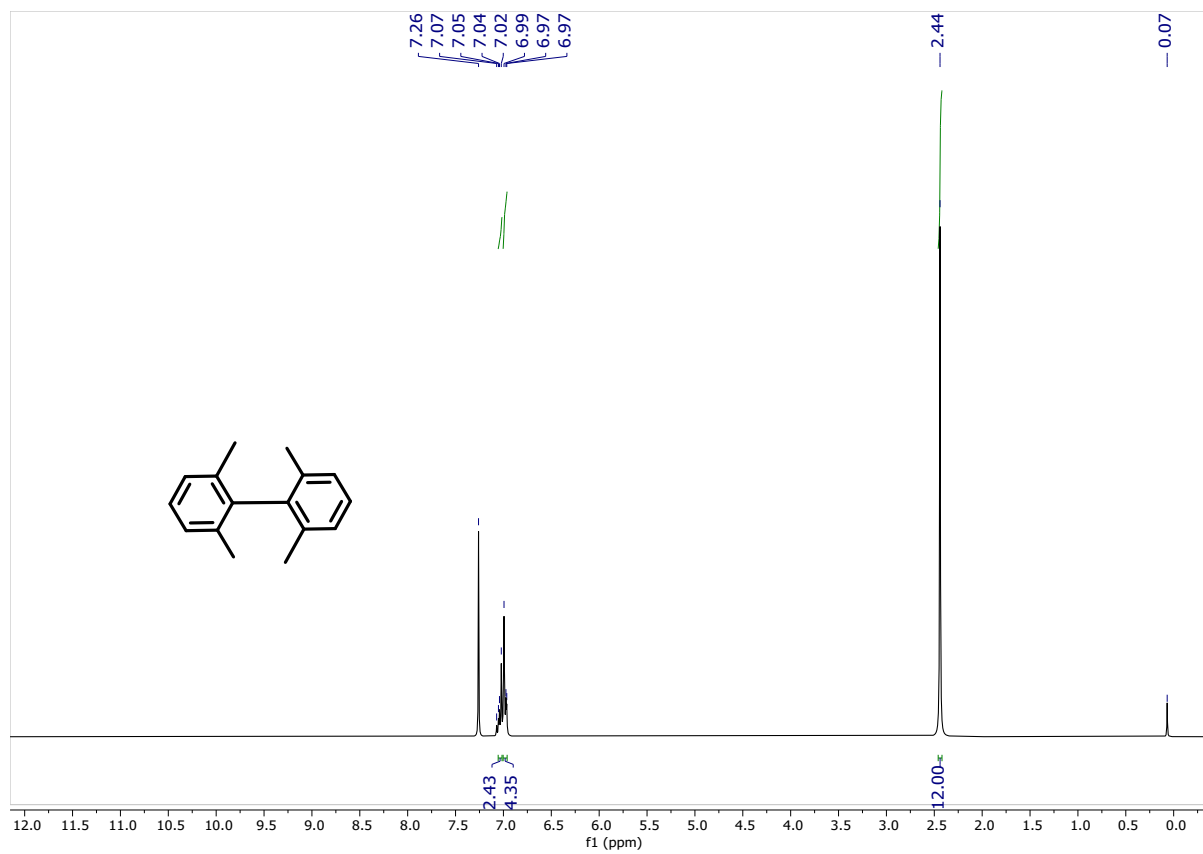

**Fig S24:**  $^1\text{H}$  NMR spectra of compound **3j** in  $\text{CDCl}_3$ .

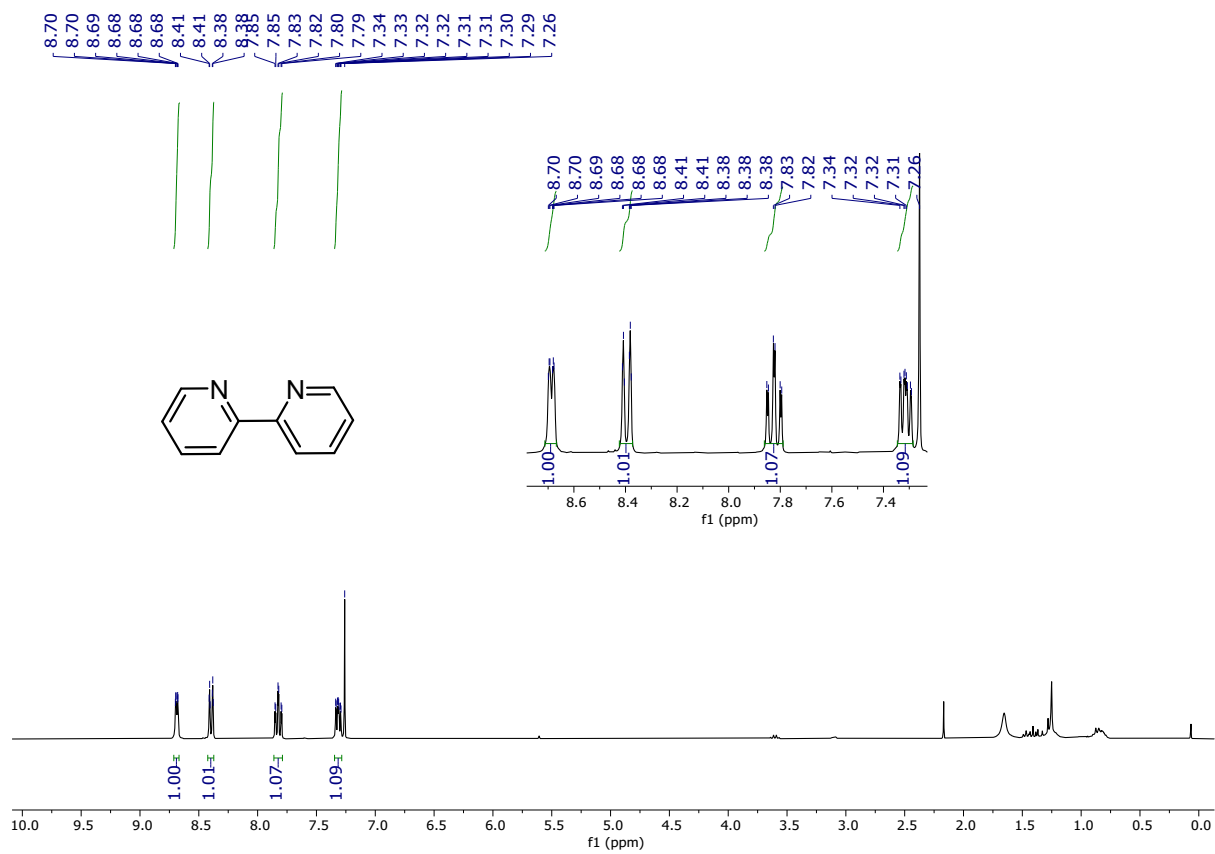

**Fig S25:** <sup>1</sup>H NMR spectra of compound **3k** in CDCl<sub>3</sub>.

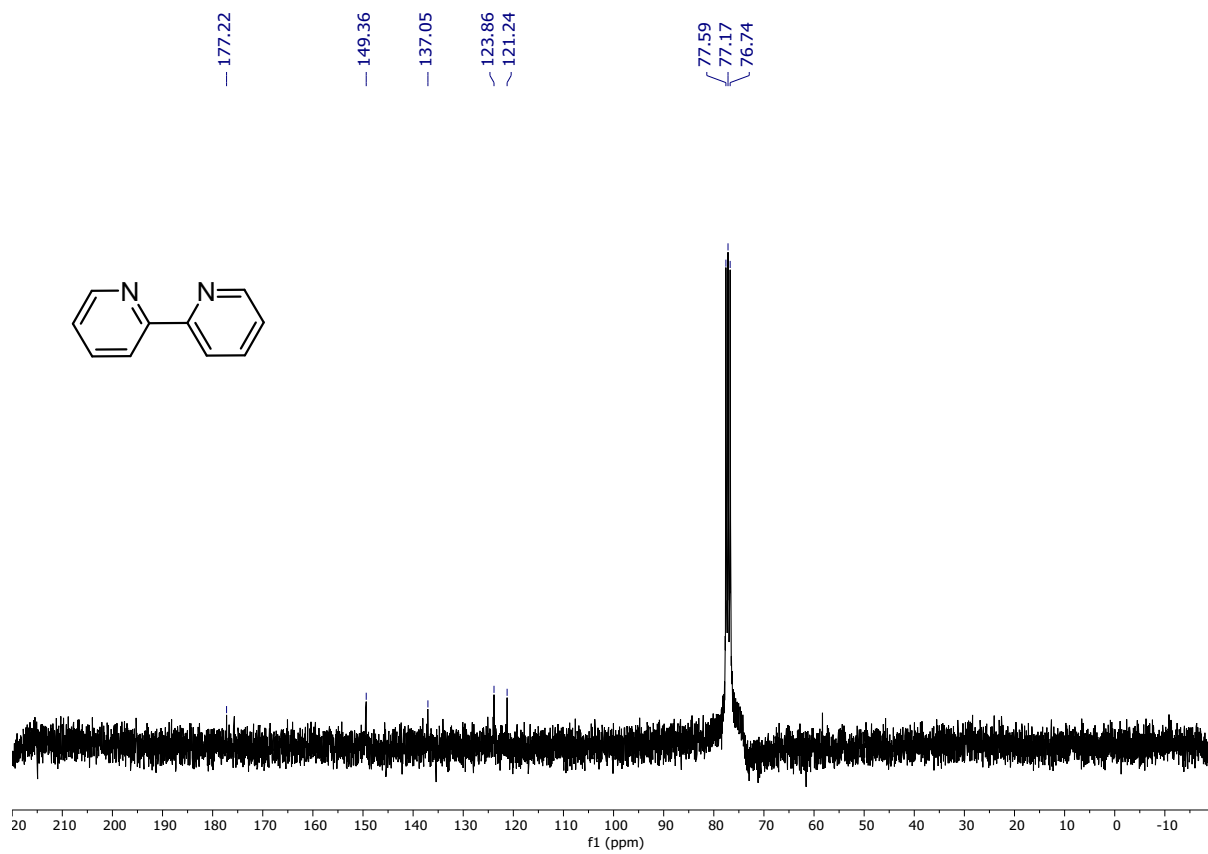

**Fig S26:** <sup>13</sup>C NMR spectra of compound **3k** in CDCl<sub>3</sub>.



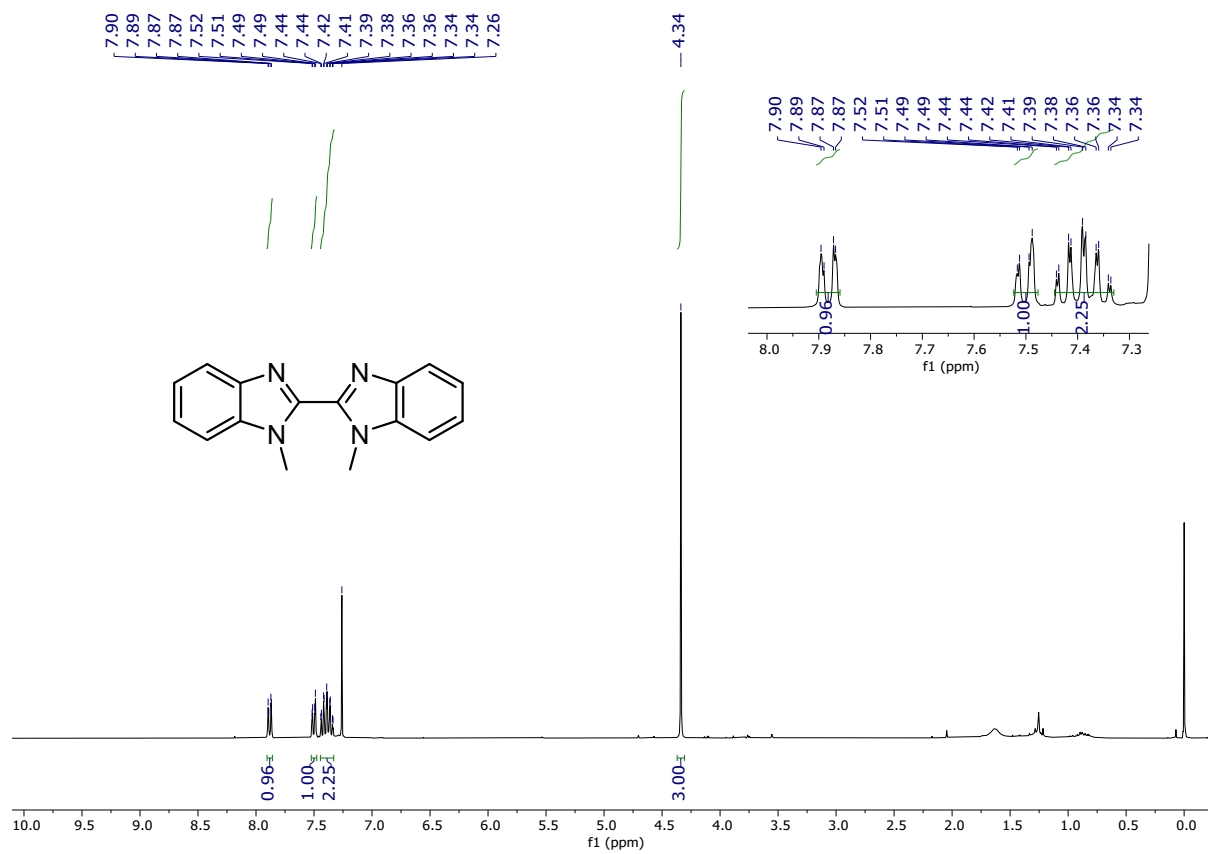

**Fig S27:**  $^1\text{H}$  NMR spectra of compound **31** in  $\text{CDCl}_3$ .

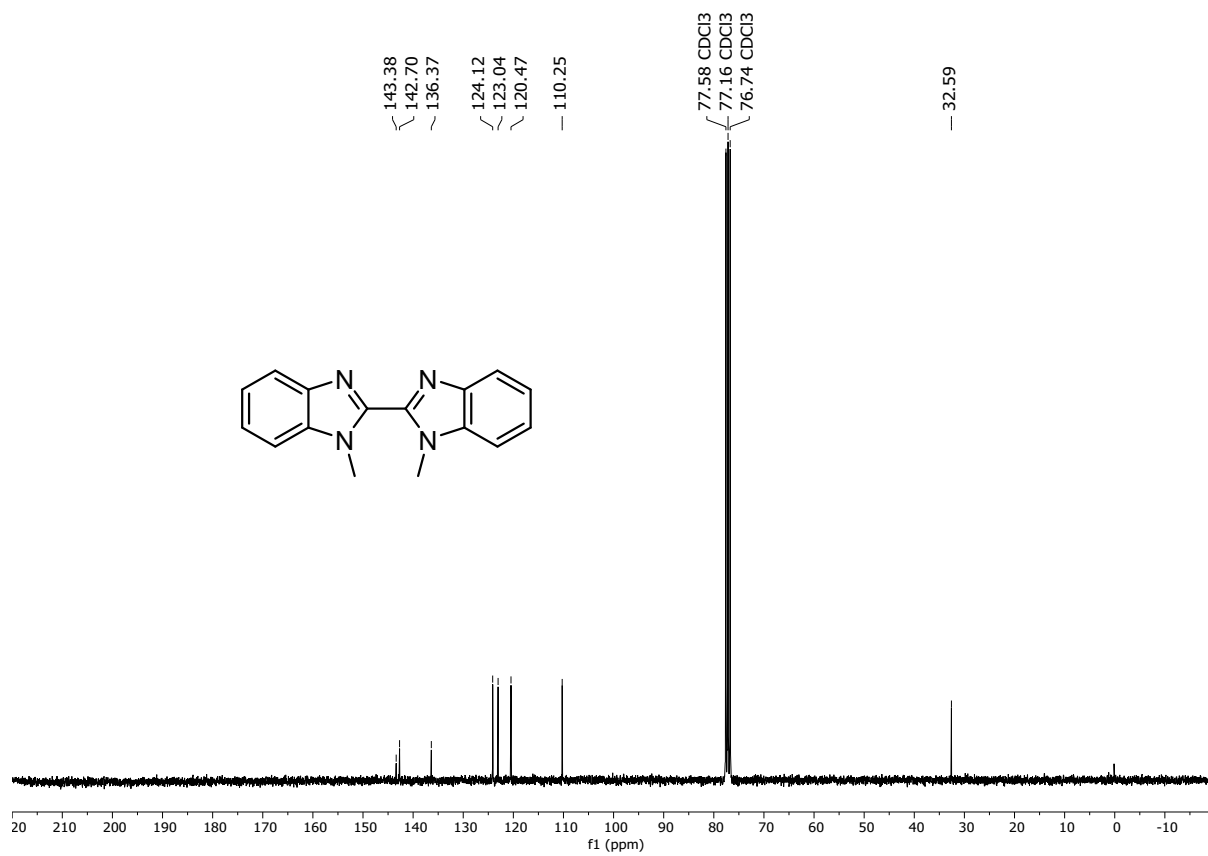

**Fig S28:**  $^{13}\text{C}$  NMR spectra of compound **31** in  $\text{CDCl}_3$ .

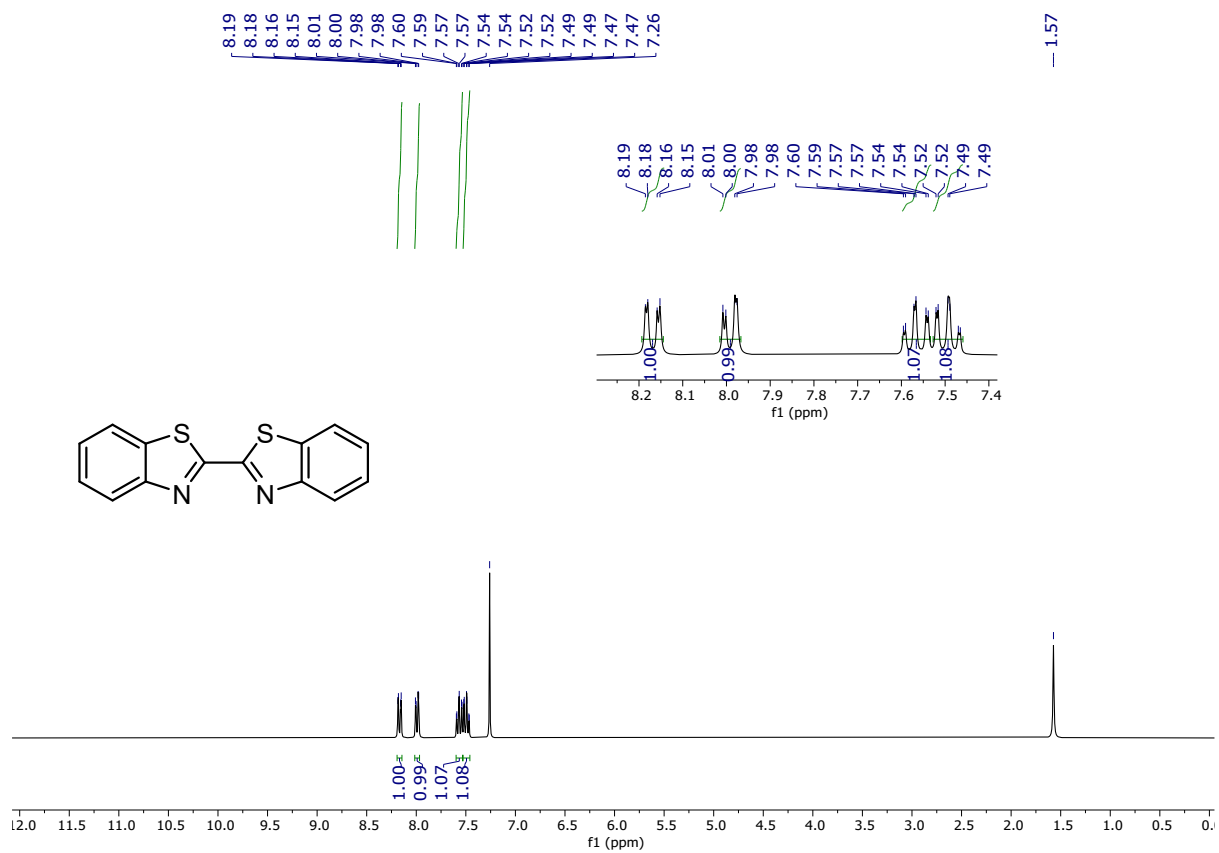

**Fig S29:** <sup>1</sup>H NMR spectra of compound **3m** in CDCl<sub>3</sub>.

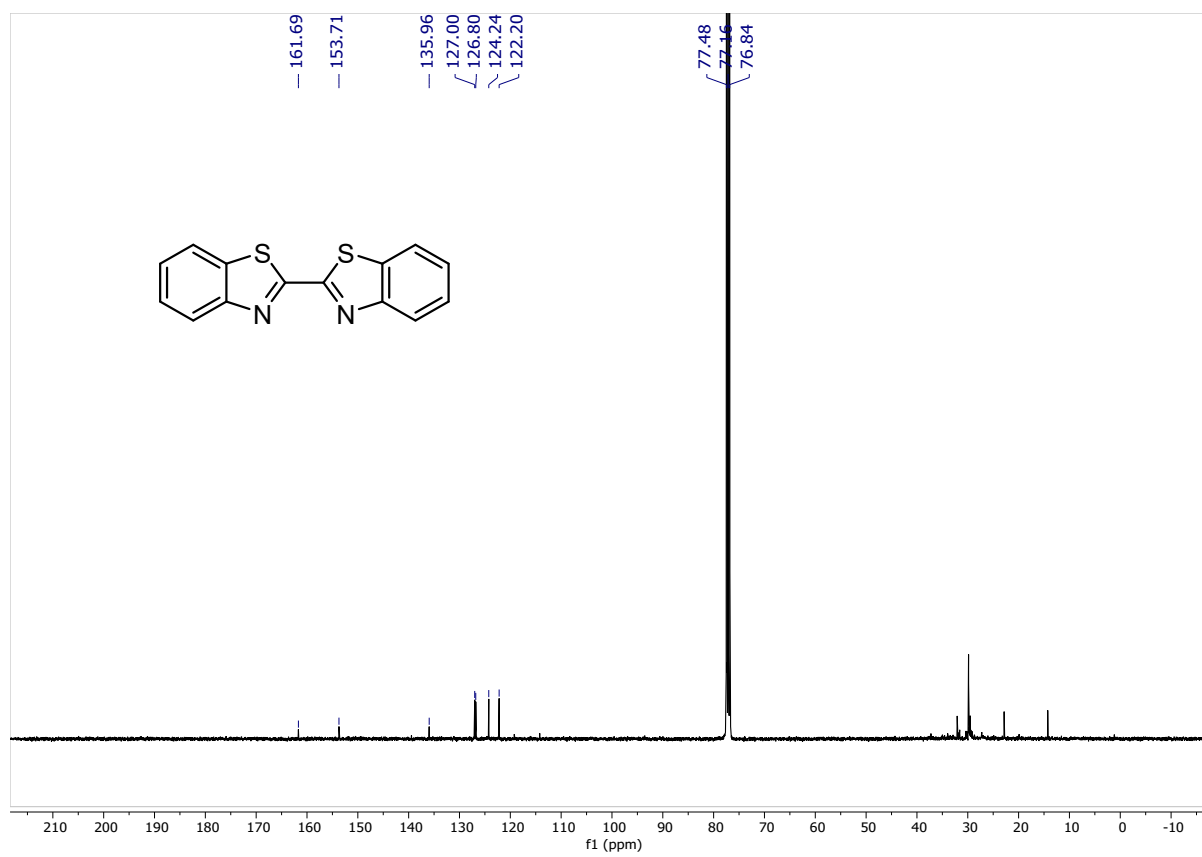

**Fig S30:**  $^{13}\text{C}$  NMR spectra of compound **3m** in  $\text{CDCl}_3$ .

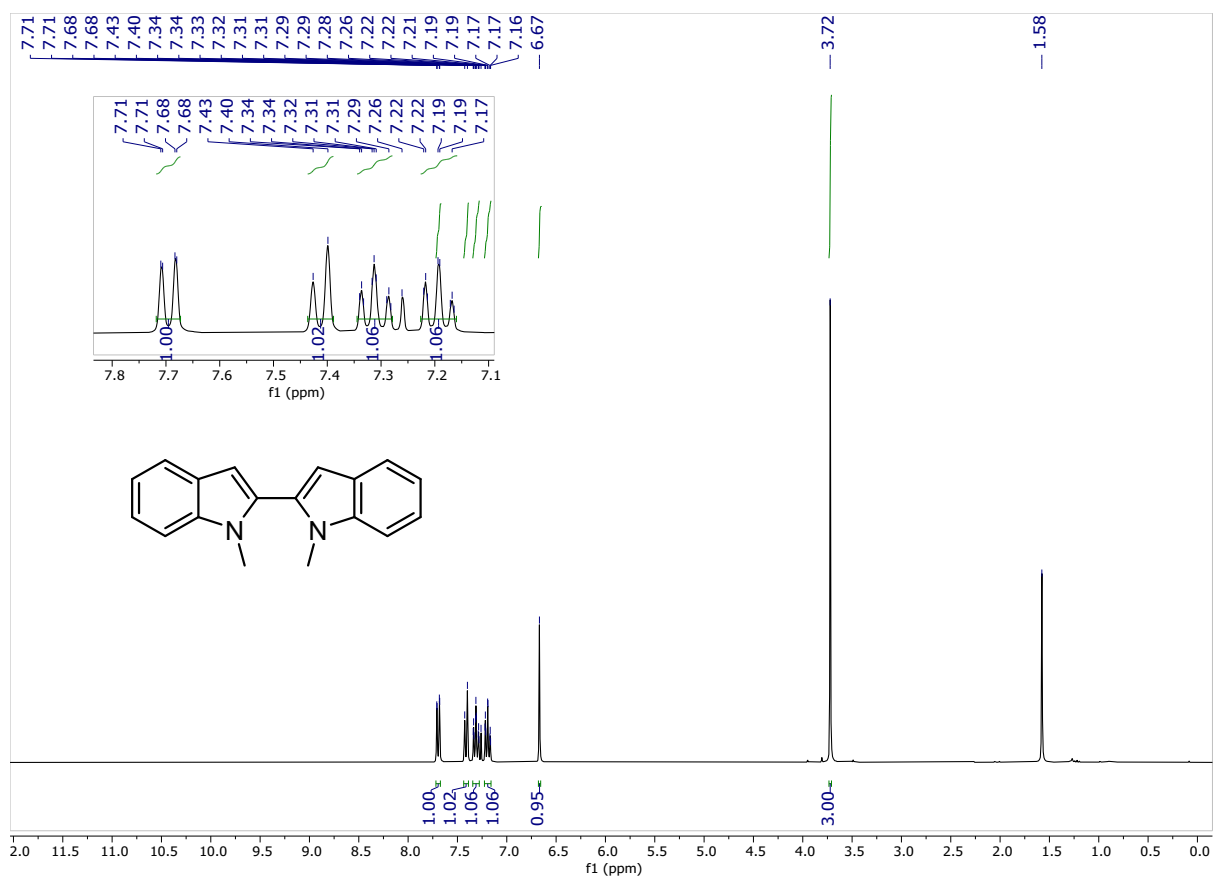

**Fig S31:**  $^1\text{H}$  NMR spectra of compound **3n** in  $\text{CDCl}_3$ .

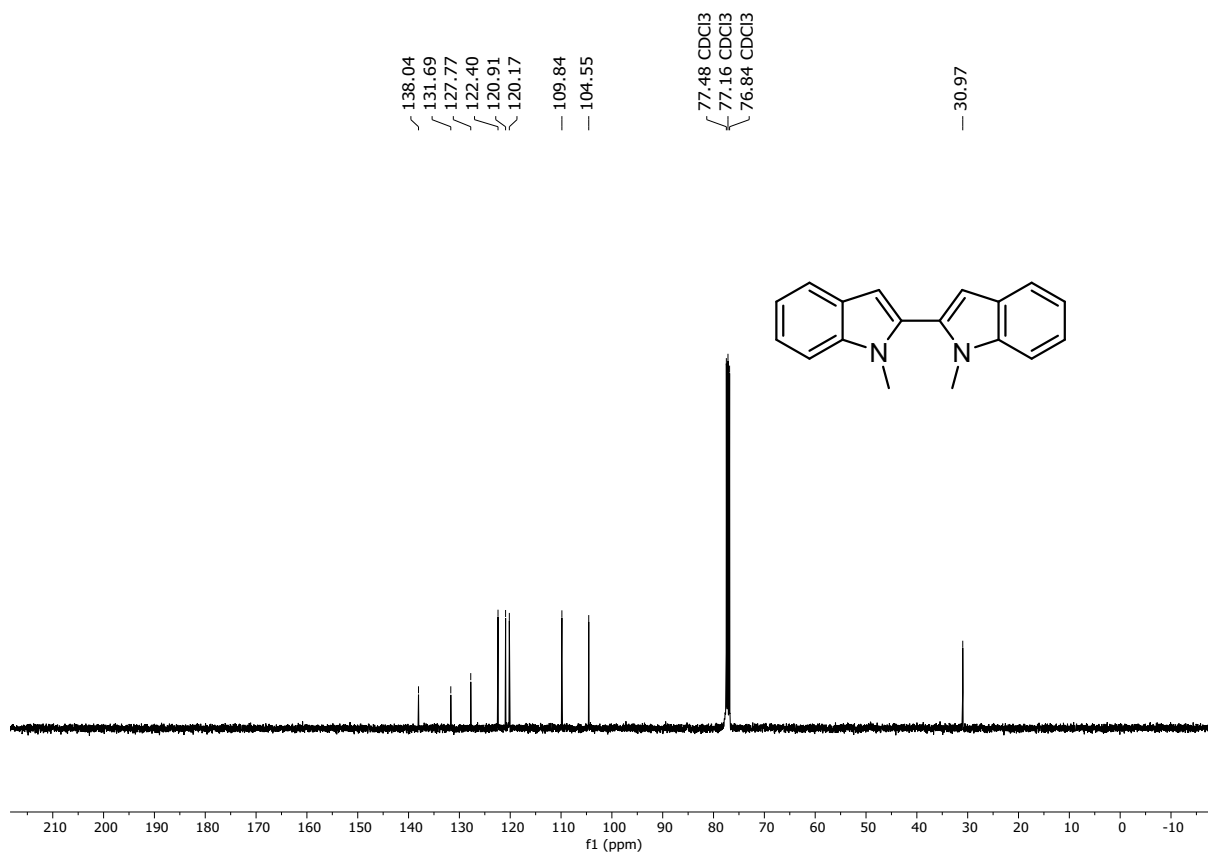

**Fig S32:**  $^{13}\text{C}$  NMR spectra of compound **3n** in  $\text{CDCl}_3$ .

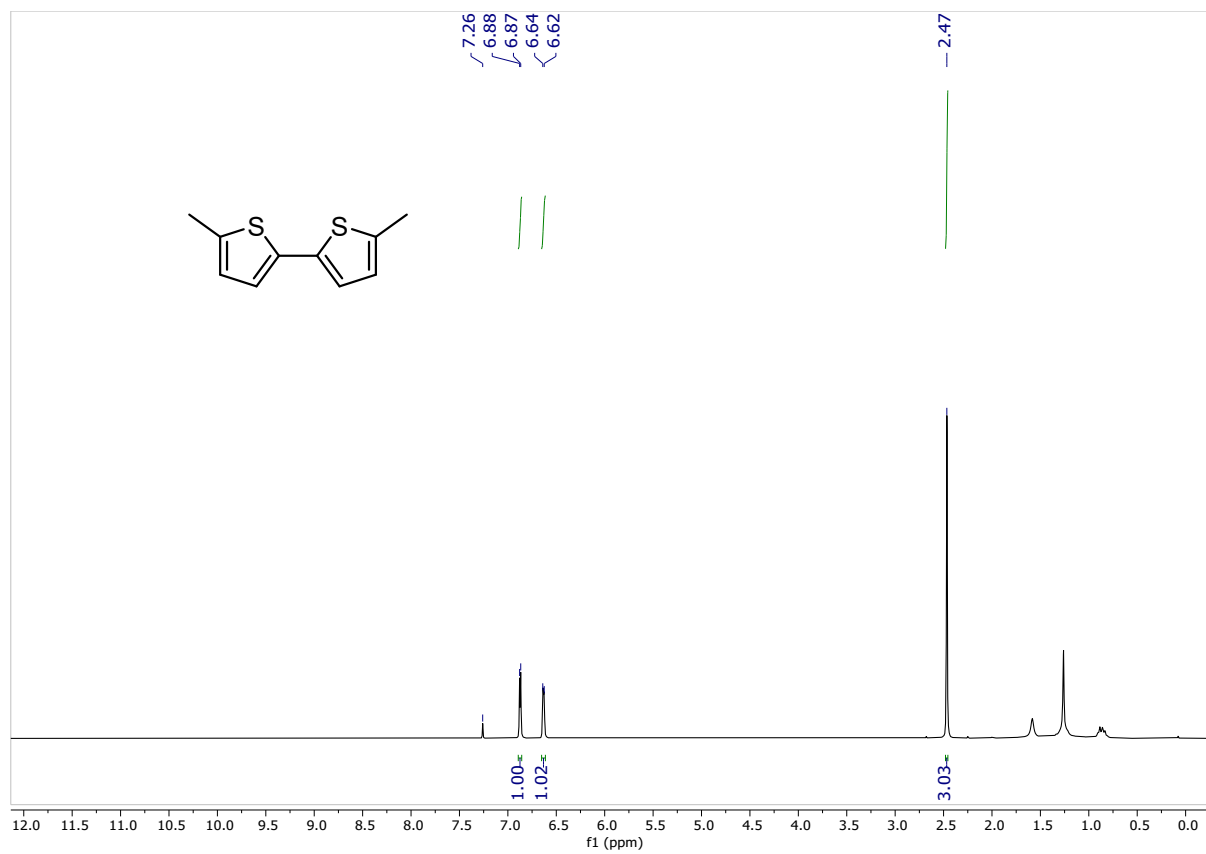

**Fig S33:**  $^1\text{H}$  NMR spectra of compound **30** in  $\text{CDCl}_3$ .

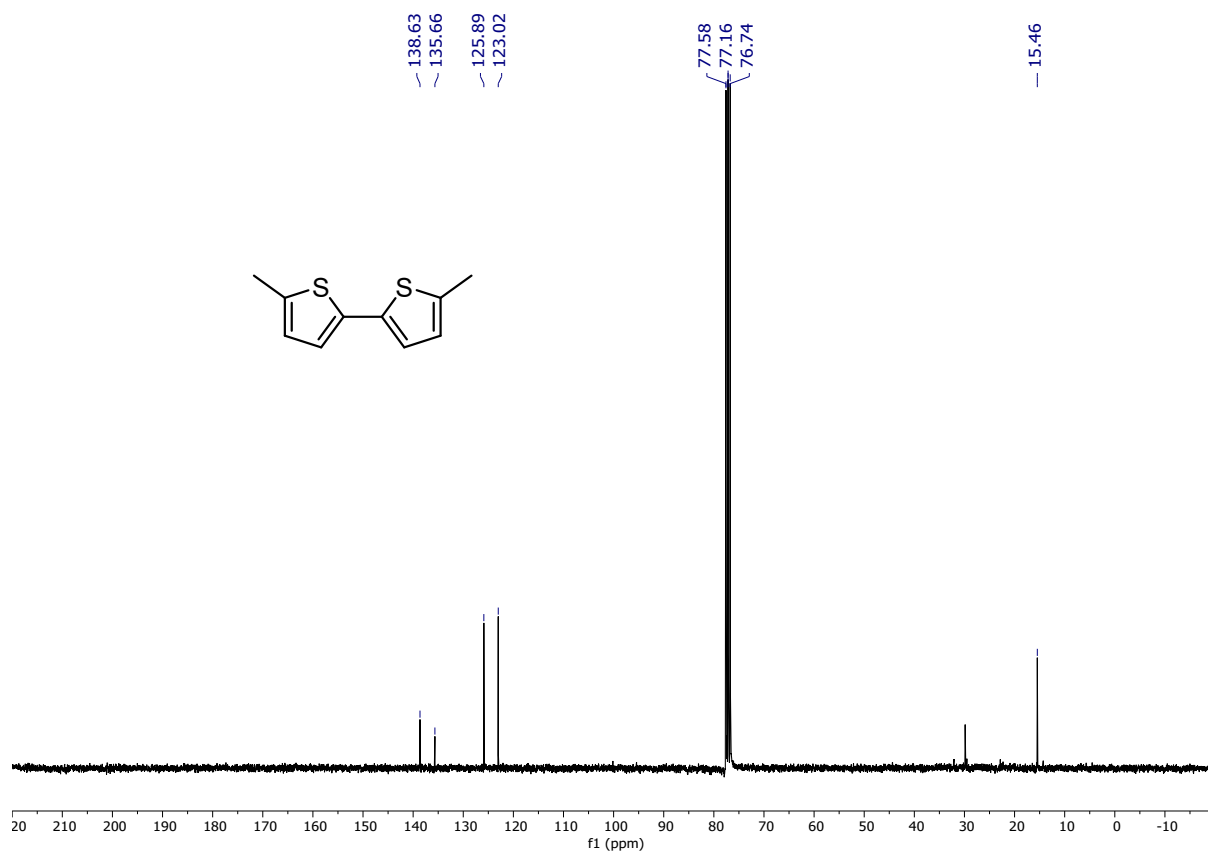

**Fig S34:**  $^{13}\text{C}$  NMR spectra of compound **3o** in  $\text{CDCl}_3$ .



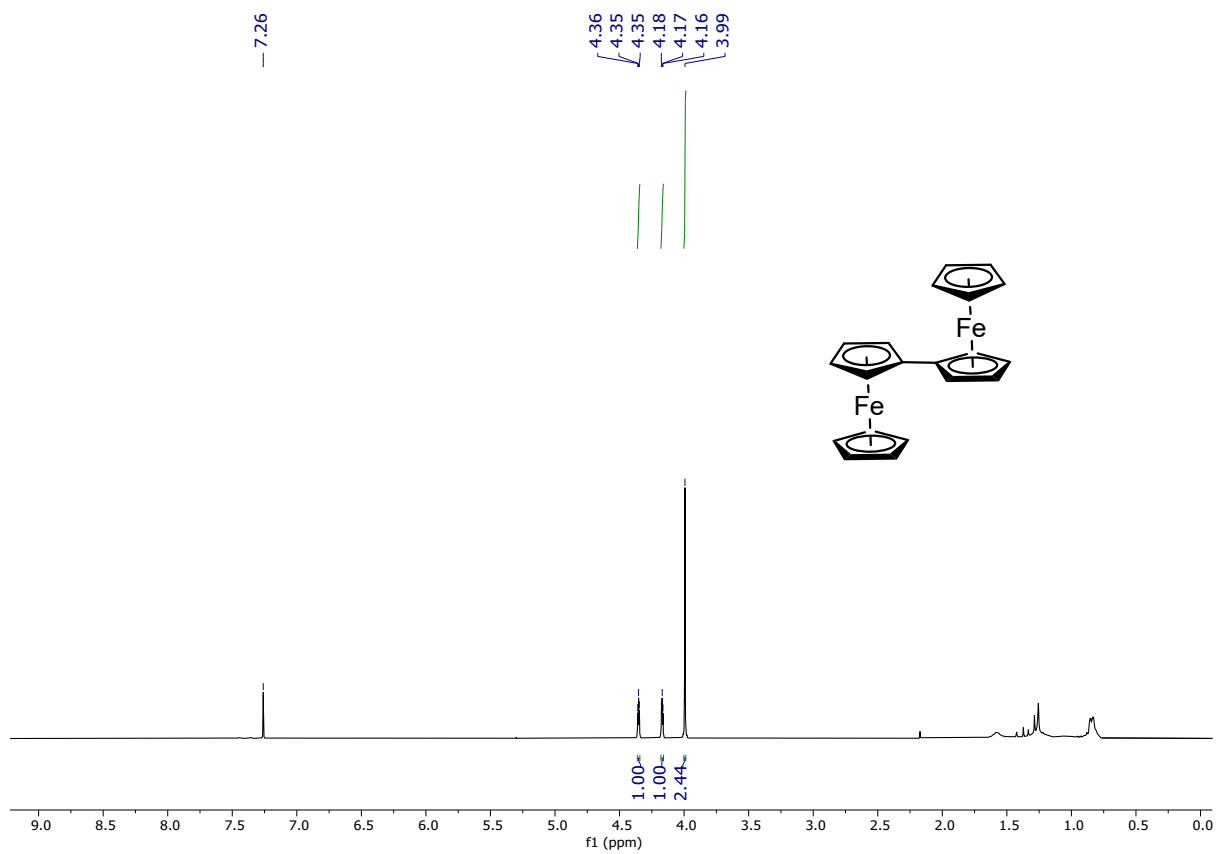

**Fig S35:**  $^1\text{H}$  NMR spectra of compound **3p** in  $\text{CDCl}_3$ .

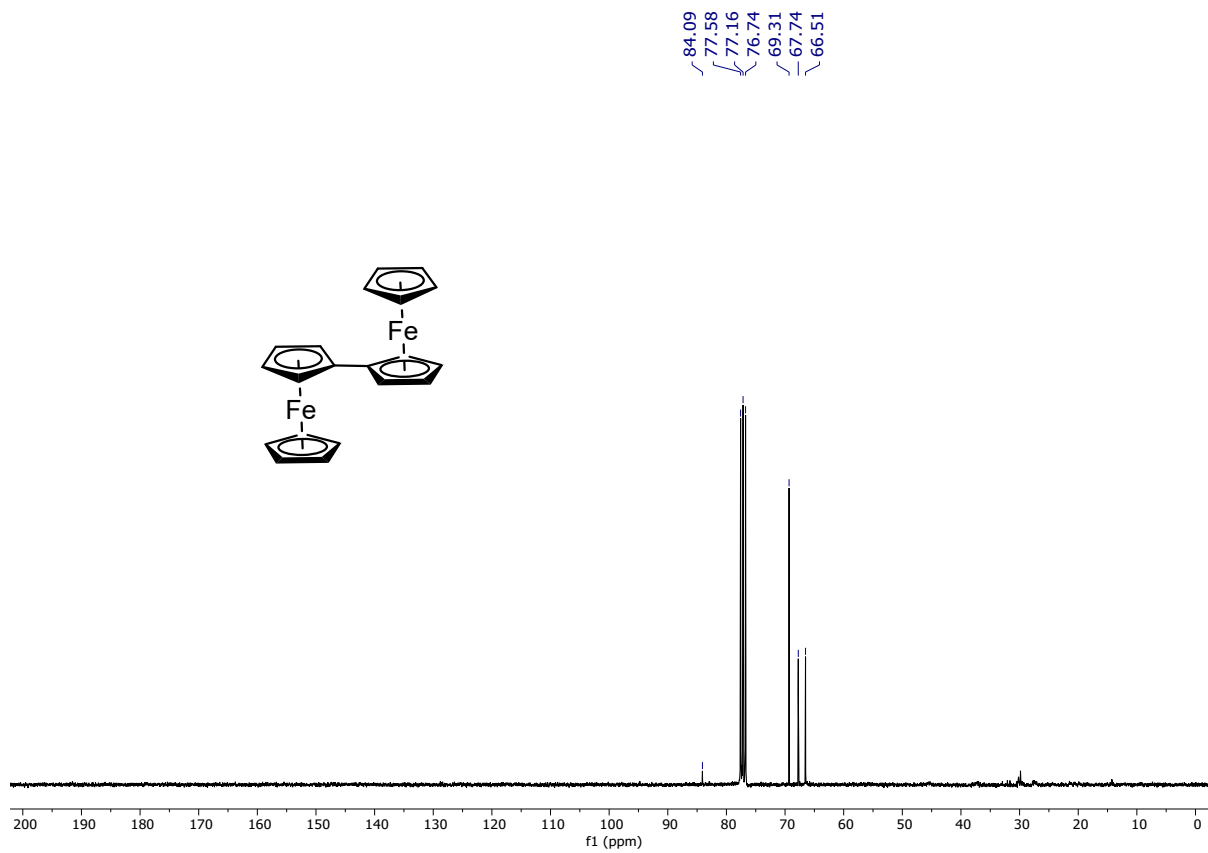

**Fig S36:**  $^{13}\text{C}$  NMR spectra of compound **3p** in  $\text{CDCl}_3$ .

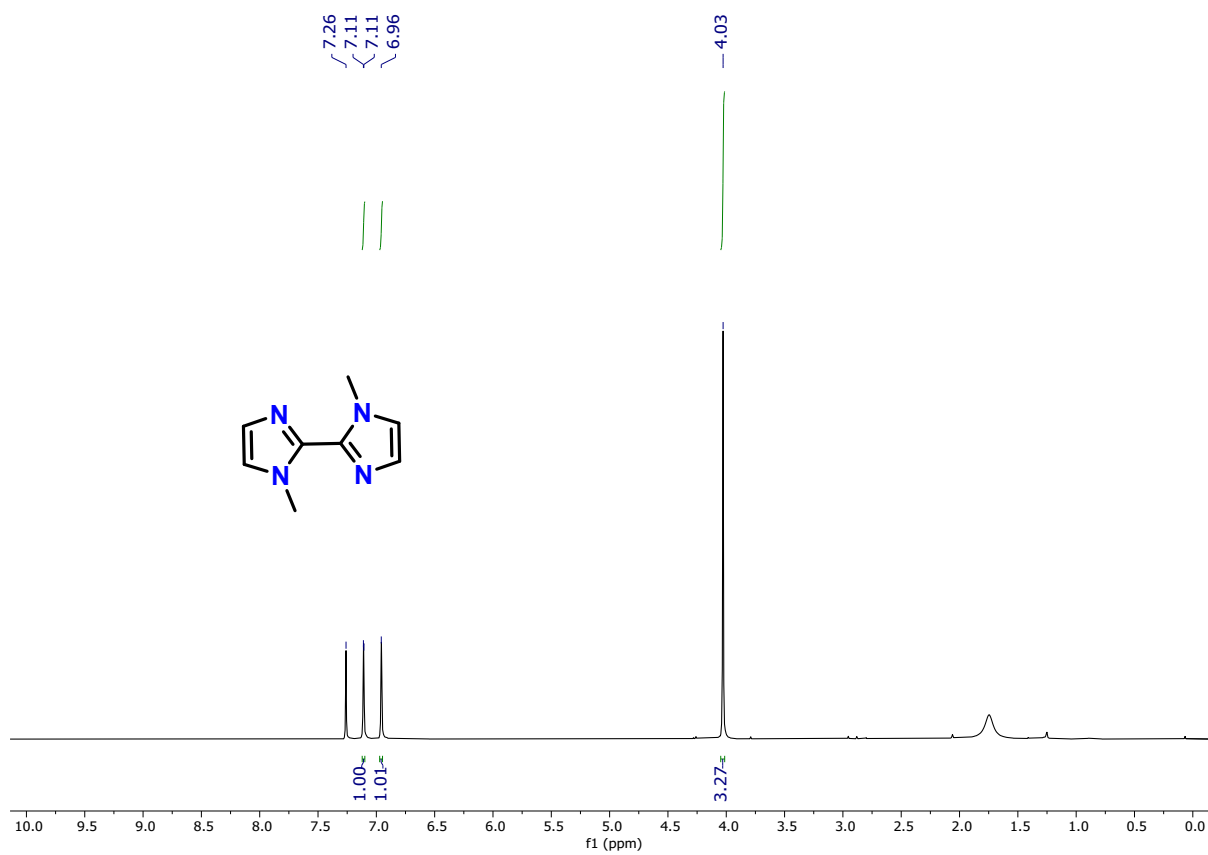

**Fig S37:** <sup>1</sup>H NMR spectra of compound **3q** in CDCl<sub>3</sub>.

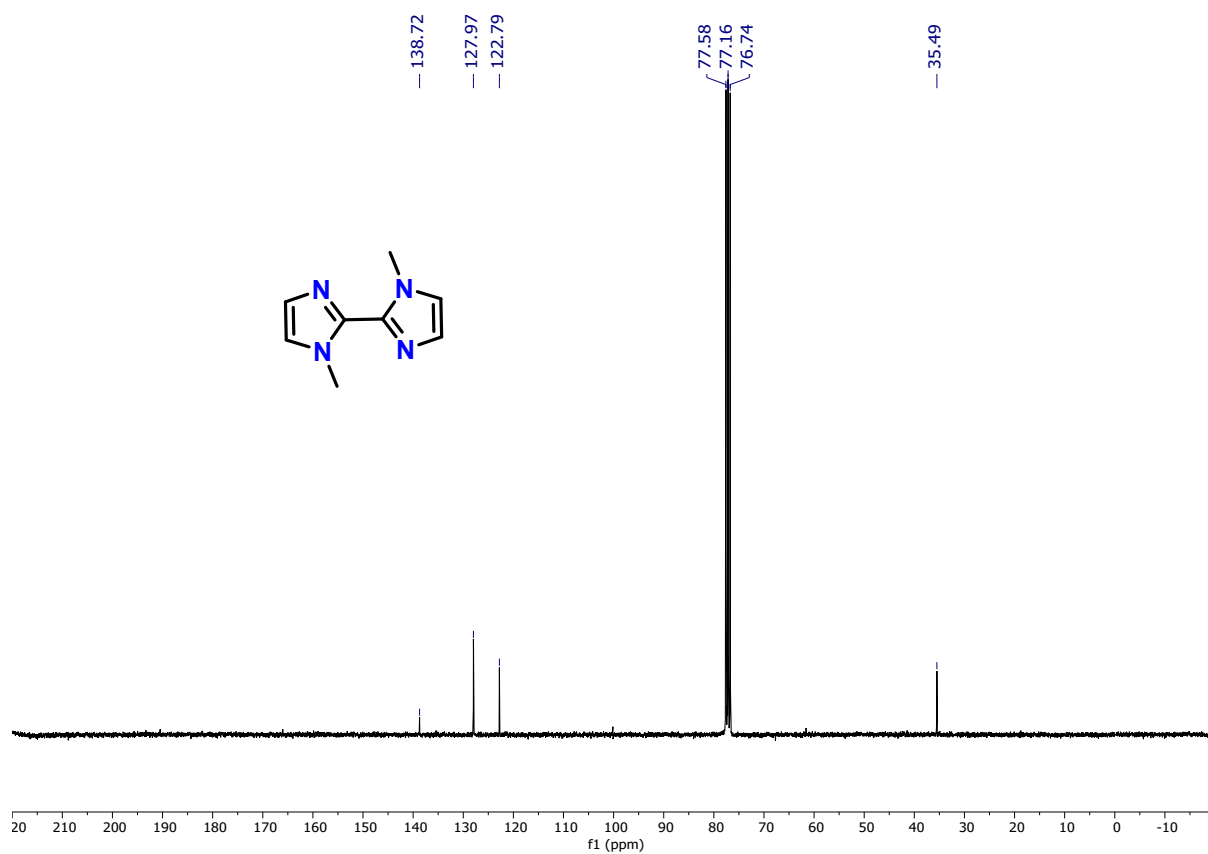

**Fig S38:**  $^{13}\text{C}$  NMR spectra of compound **3q** in  $\text{CDCl}_3$ .

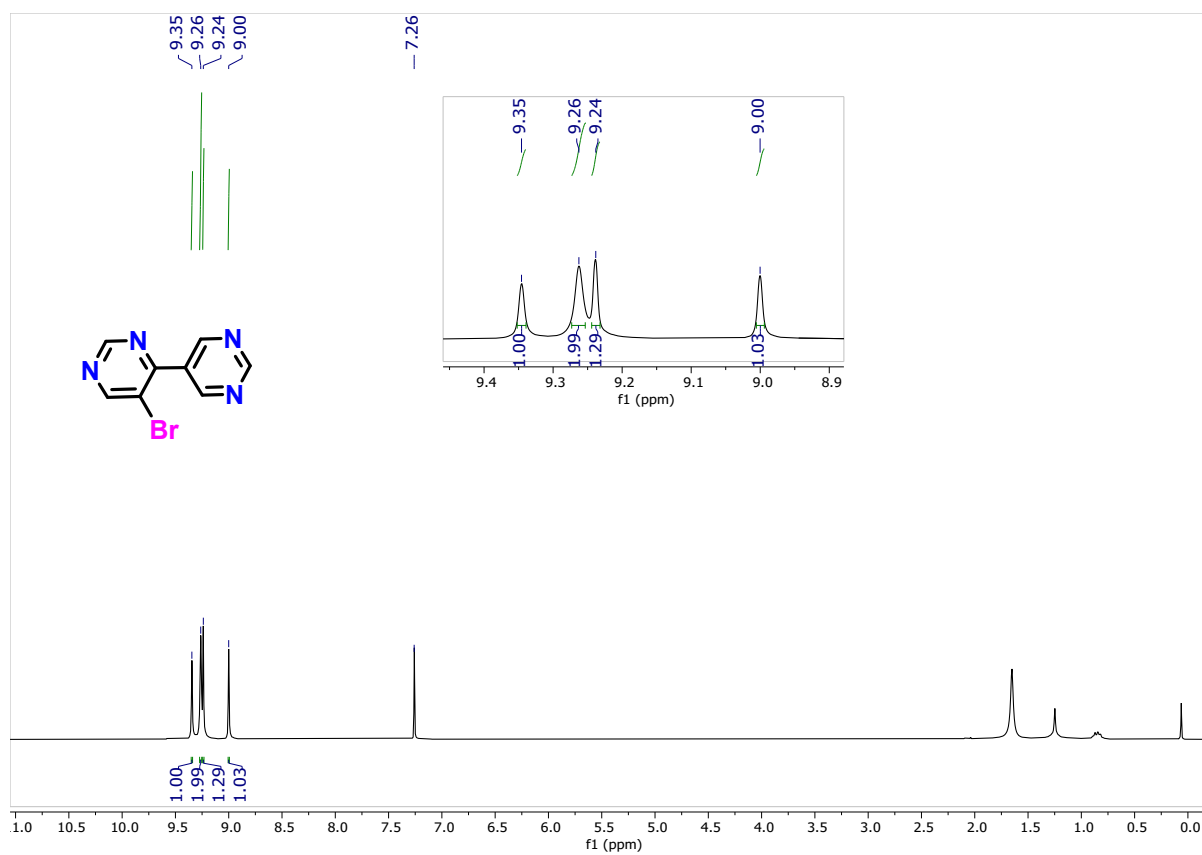

**Fig S39:** <sup>1</sup>H NMR spectra of compound **3r** in CDCl<sub>3</sub>.

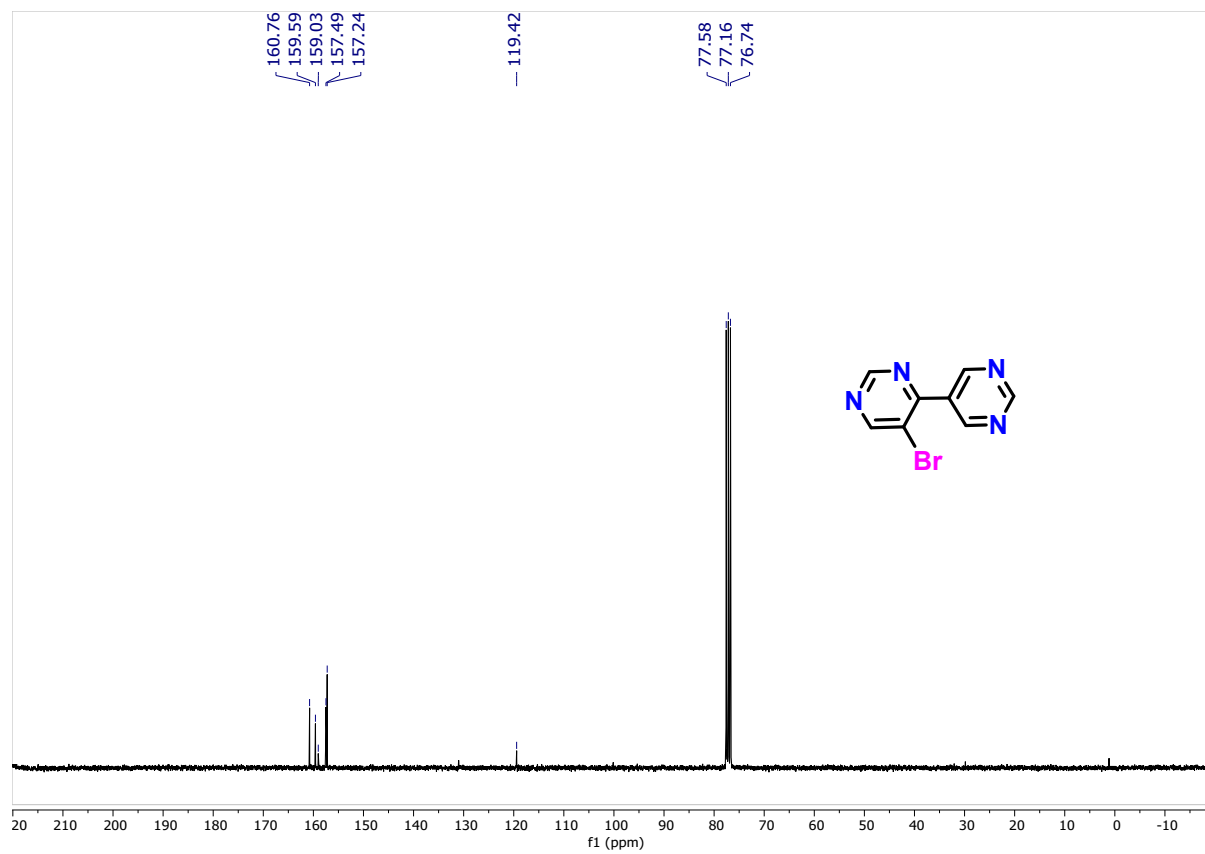

**Fig S40:**  $^{13}\text{C}$  NMR spectra of compound **3r** in  $\text{CDCl}_3$ .

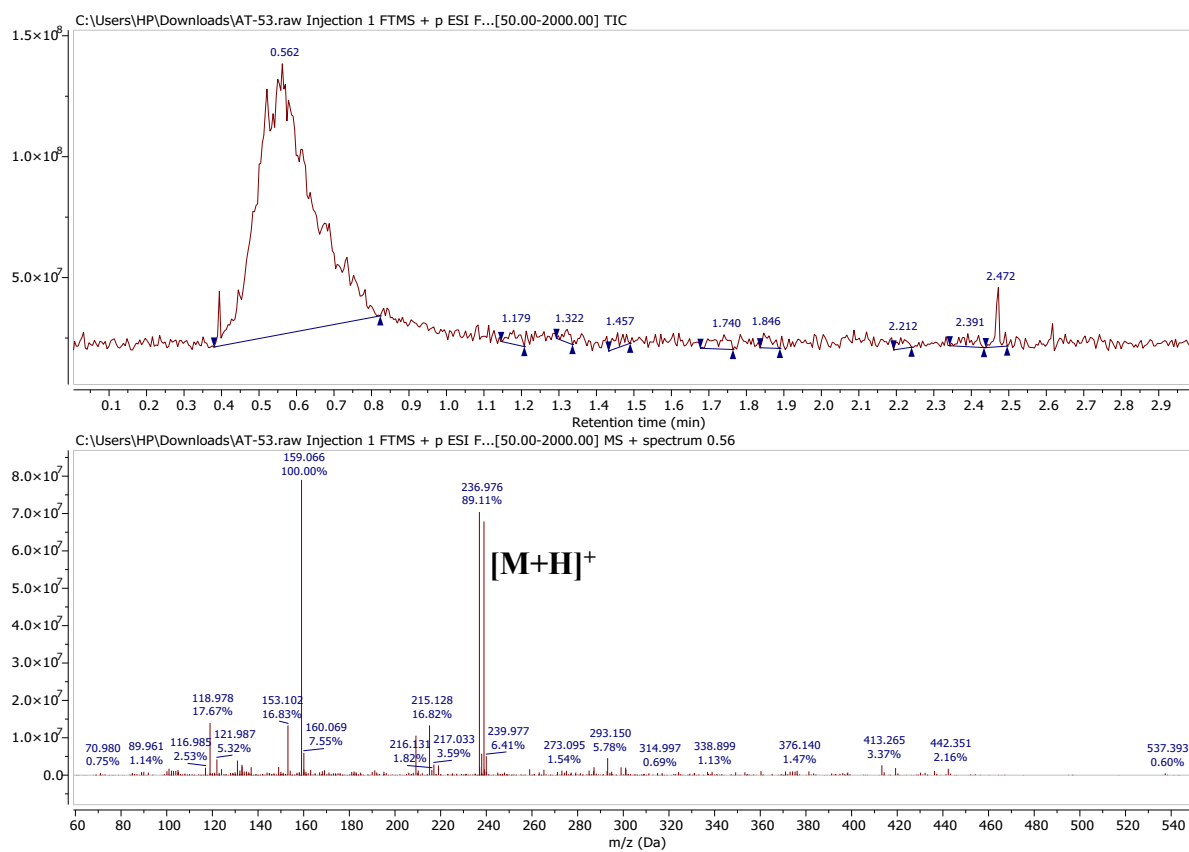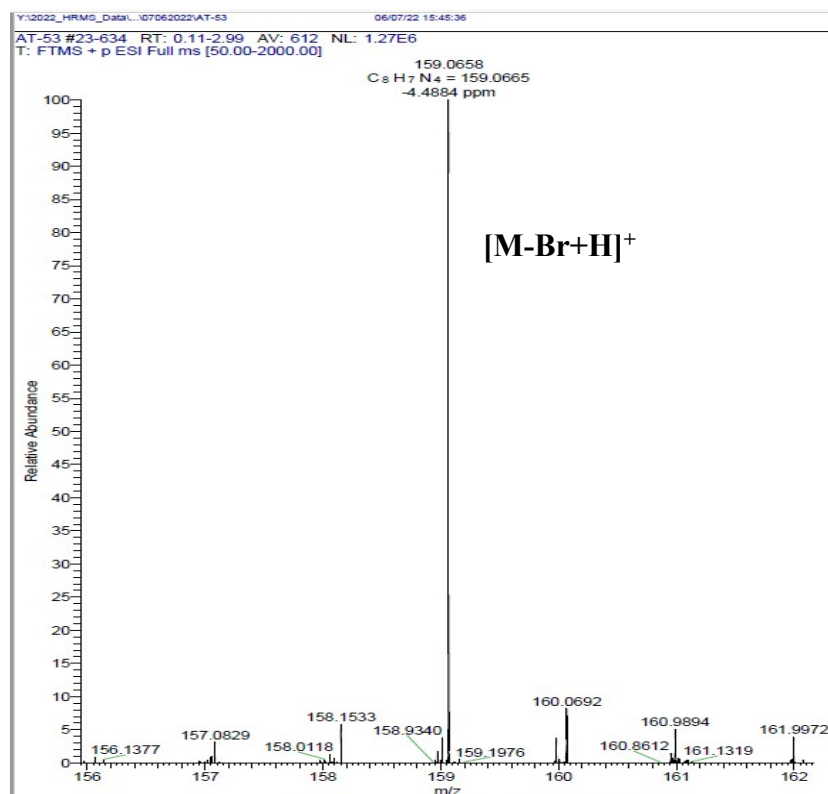

Fig S41: HRMS of compound **3r**.

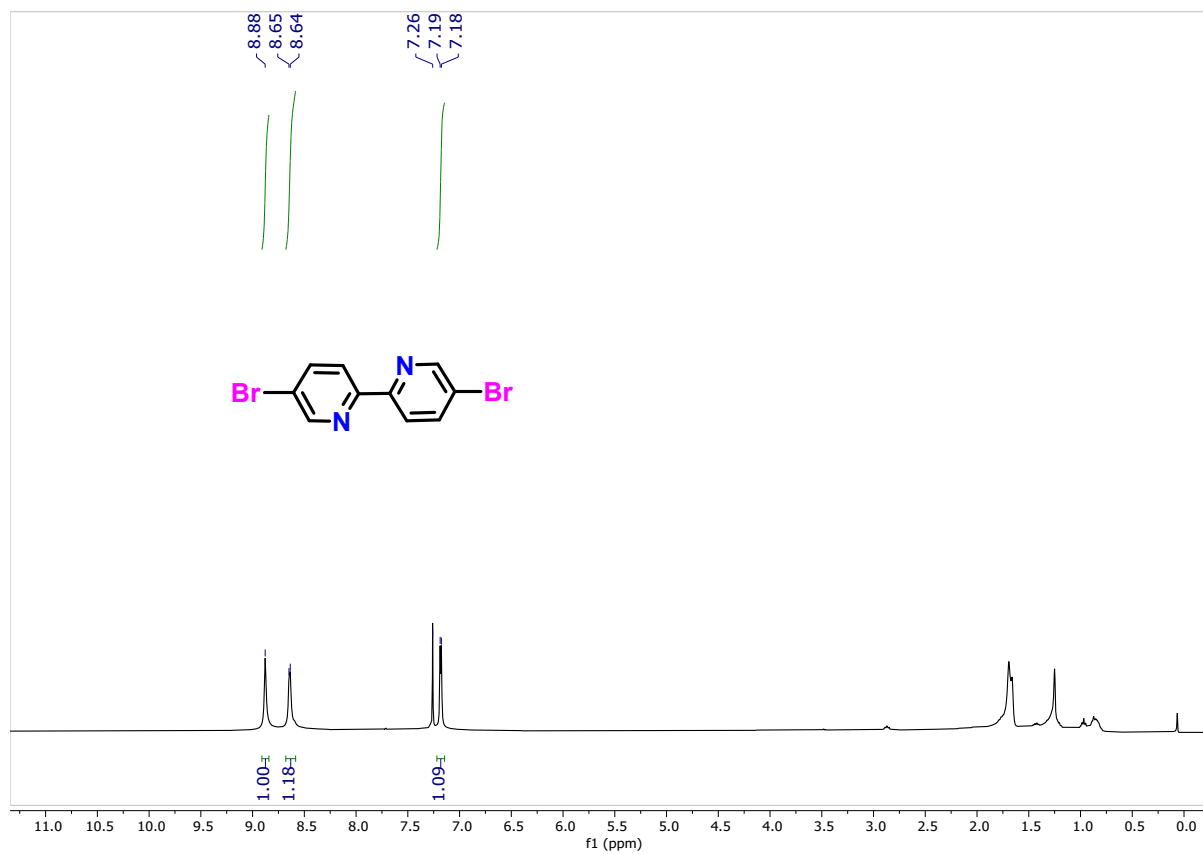

**Fig S42:** <sup>1</sup>H NMR spectra of compound **3s** in CDCl<sub>3</sub>.



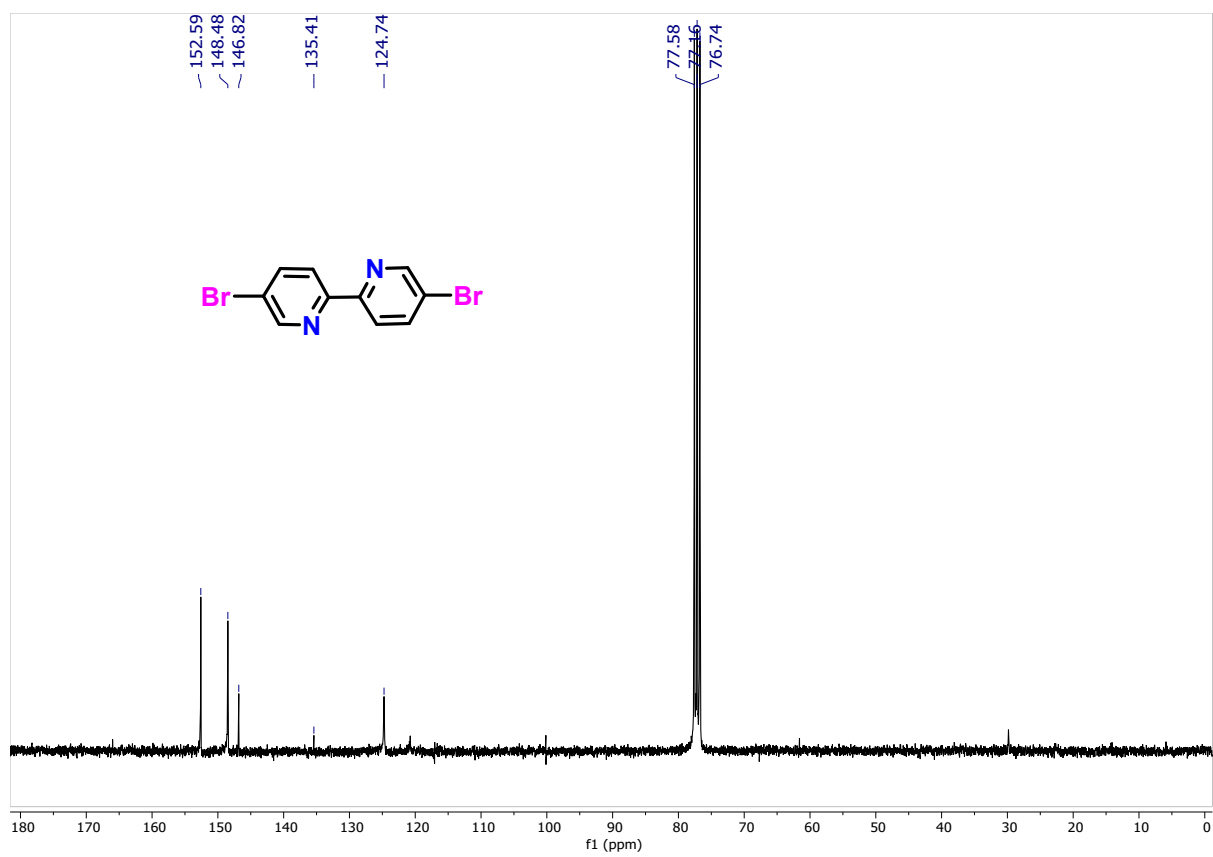

**Fig S43:**  $^{13}\text{C}$  NMR spectra of compound **3s** in  $\text{CDCl}_3$ .

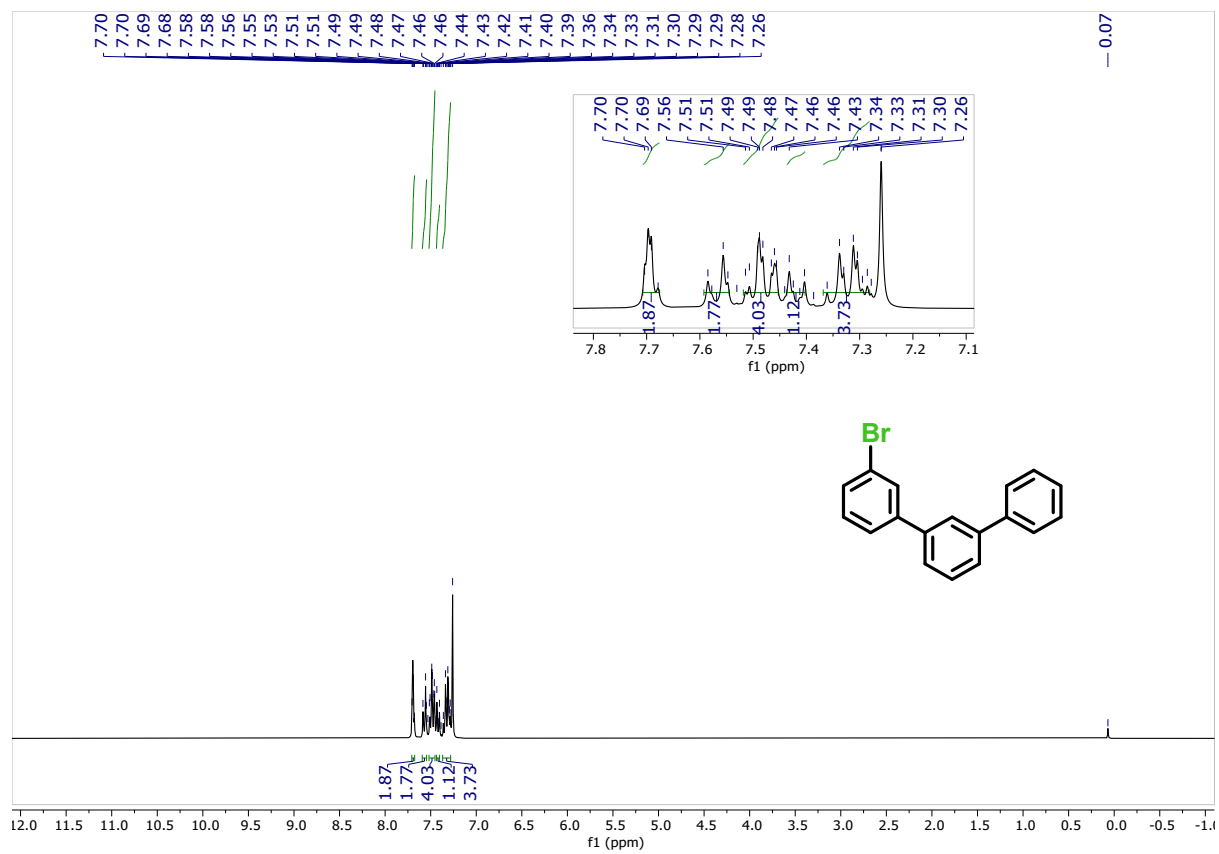

**Fig S44:** <sup>1</sup>H NMR spectra of compound **3t** in CDCl<sub>3</sub>.

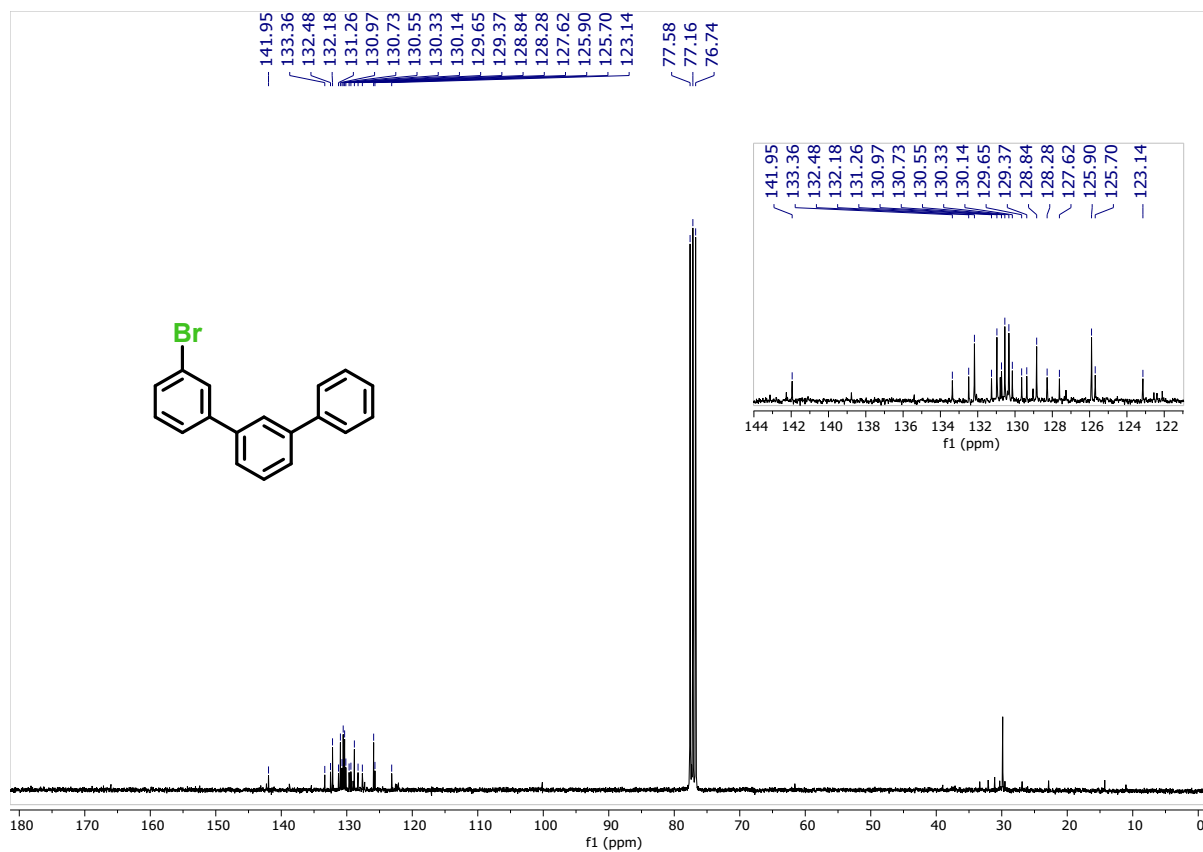

**Fig S45:**  $^{13}\text{C}$  NMR spectra of compound **3t** in  $\text{CDCl}_3$ .

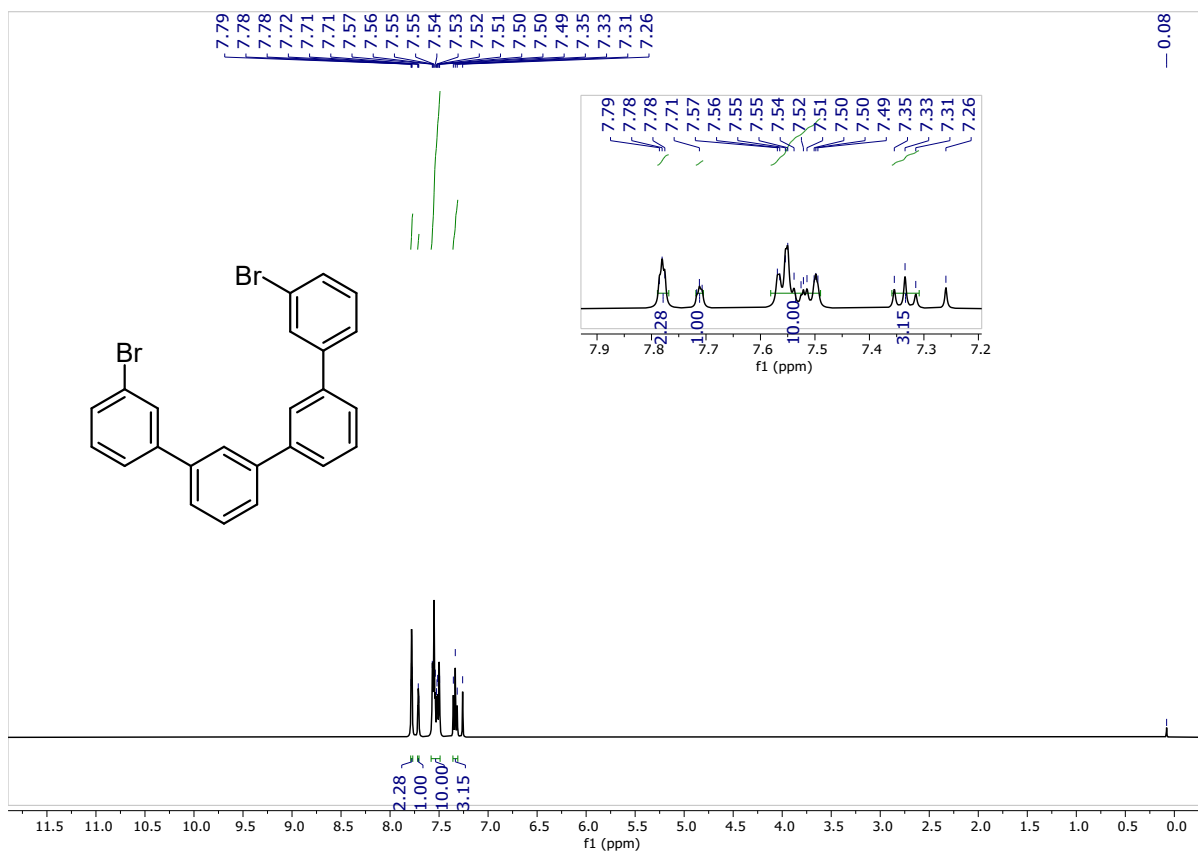

**Fig S46:**  $^1\text{H}$  NMR spectra of compound **3u** in  $\text{CDCl}_3$ .

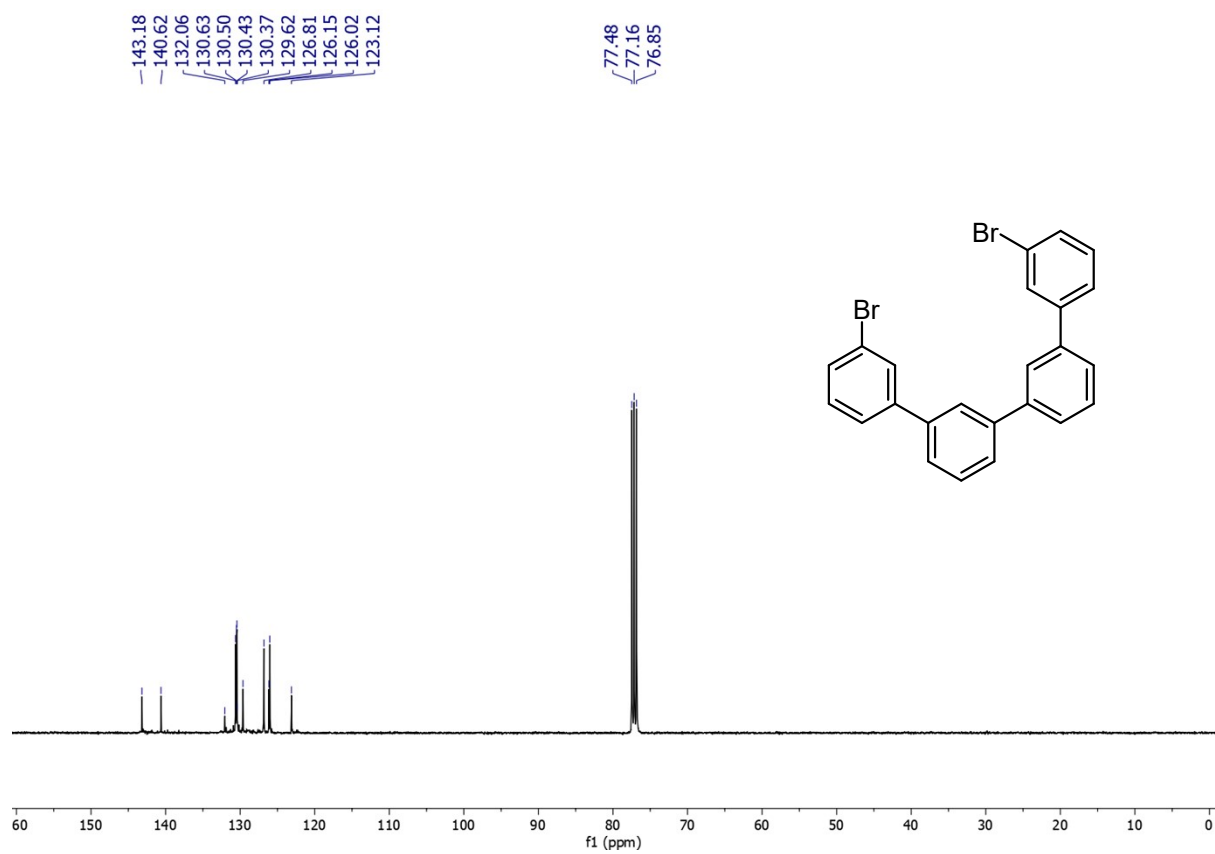

**Fig S47:**  $^{13}\text{C}$  NMR spectra of compound **3u** in  $\text{CDCl}_3$ .



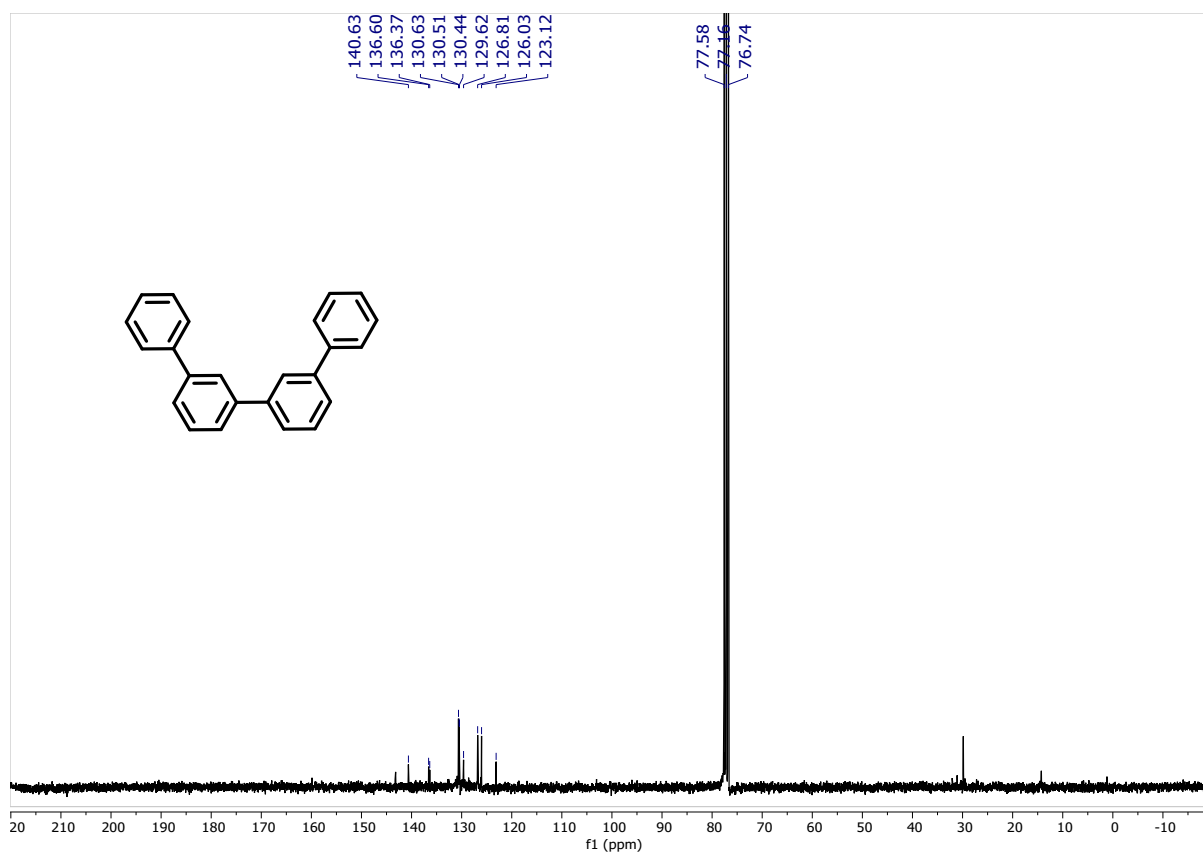

**Fig S49:**  $^{13}\text{C}$  NMR spectra of compound **3v** in  $\text{CDCl}_3$ .

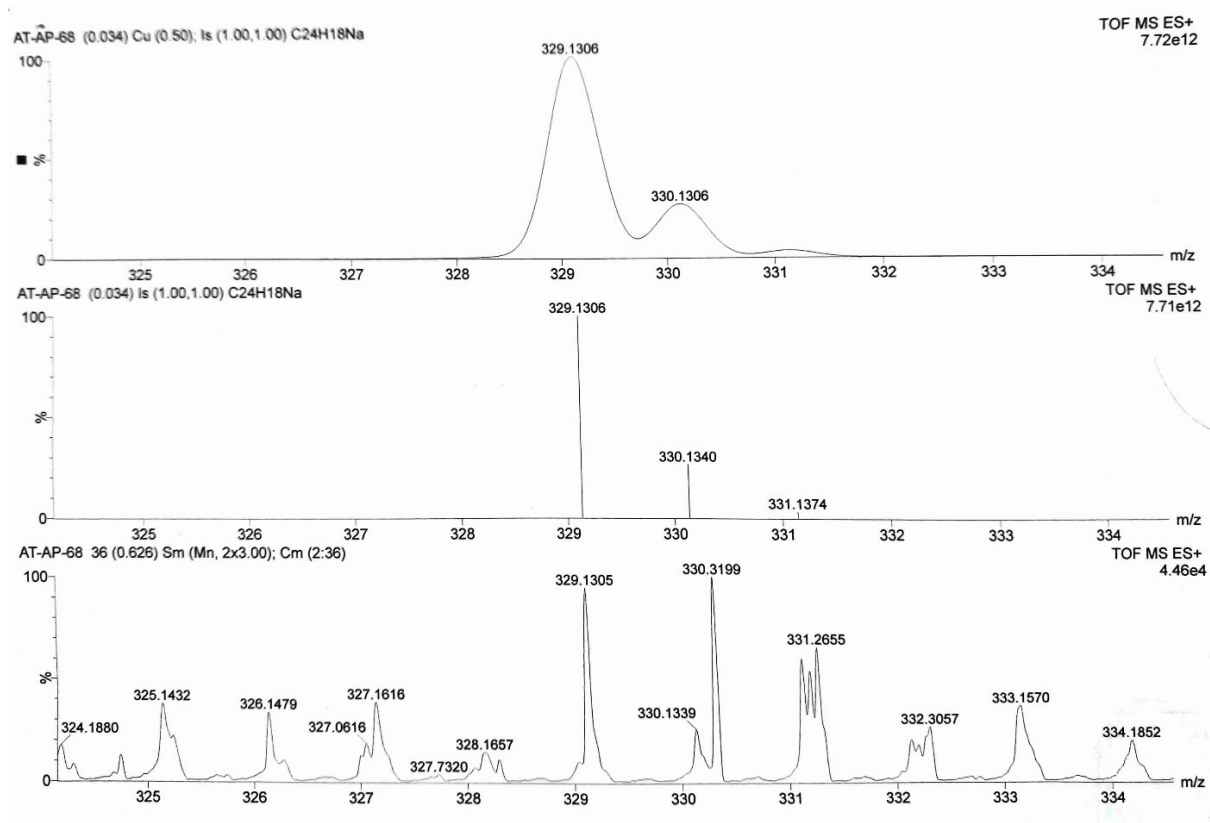

**Fig S50:** HRMS of compound **3v**  $[M+Na]^+$ .



## References:

1. A. J. Roberts, A. R. Kennedy, R. McLellan, S. D. Robertson, E. Hevia, *Eur. J. Inorg. Chem.* 2016, **2016**, 4752-4760.
2. X. Yu, L. Zhang, X. Hana, J. Wang, Y. Tian, G. Liu, *J. Organometal. Chem.* 2017, **833**, 50-53.
3. J. C. DeMott, N. Bhuvanesh, O. V. Ozerov, *Chem. Science.* 2013, **4**, 642-649.
4. P. Beak, G. W. Selling, *J. Org. Chem.* 1989, **54**, 5574-5580.
5. S. Harder, J. Boersma, L. Brandsma, J. A. Kanters, A. J. M. Duisenberg, J. H. Van Lenthe, *Organometallics* 1990, **9**, 511-516.
6. K. A. Punch, M. J. Piggott, *Org. Biomol. Chem.* 2014, **12**, 2801-2810.
7. Q. Fang, J. Li, S. Li, R. Duan, S. Wang, Y. Yi, X. Guo, Y. Qian, W. Huang, G. Yang, *Chem. Commun.* 2017, **53**, 5702-5705.
8. C. Hoffend, M. Diefenbach, E. Januszewski, M. Bolte, H. -W. Lerner, M. C. Holthausen, M. Wagner, *Dalton Trans.* 2013, **42**, 13826-13837.
9. J. Dupont, N. Beydoun, M. Pfeffer, *J. Chem. Soc., Dalton Trans.* 1989, 1715-1720.
10. Á. García-Romero, A. J. Plajer, D. Miguel, D. S. Wright, A. D. Bond, C. M. Álvarez, R. García-Rodríguez, *Inorg. Chem.* 2020, **59**, 7103-7116.
11. H. Kojima, K. Yamamoto, Y. Kinoshita, H. Inoue, *J. Het. Chem.* 1992, **29**, 1473-1476.
12. C. Hidenori, I. Megumi, O. Keiji, I. Kazuyoshi, *Bull. Chem. Soc. Jpn.* 1988, **61**, 3637-3648.
13. B. Gao, S. Li, P. Wu, J. E. Moses, K. B. Sharpless, *Angew. Chem. Int. Ed.* 2018, **57**, 1939-1943.
14. N. Takeda, Y. Kobori, K. Okamura, M. Yasui, M. Ueda, *Org. Lett.* 2020, **22**, 9740-9744.
15. W. Erb, F. Mongin, *Synthesis* 2019, **51**, 146-160.
16. D. Vagedes, G. Kehr, D. König, K. Wedeking, R. Fröhlich, G. Erker, C. Mück-Lichtenfeld, S. Grimme, *Eur. J. Inorg. Chem.* 2002, **2002**, 2015-2021.
17. K. H. Au Yeung, T. Kühne, F. Eisenhut, M. Kleinwächter, Y. Gisbert, R. Robles, N. Lorente, G. Cuniberti, C. Joachim, G. Rapenne, C. Kammerer, F. Moresco, *J. Phys. Chem. Lett.* 2020, **11**, 6892-6899.

18. A. Seiji, Y. Toshiaki, M. Tomohide, M. Chieno, JP2009023914A.
19. C. Matera, M. Quadri, M. Sciacaluga, D. Y. Pomè, F. Fasoli, M. De Amici, S. Fucile, C. Gotti, C. Dallanoce, G. Grazioso, *Eur. J. Med. Chem.* 2016, **108**, 392-405.
20. H. Fukumoto, M. Ando, T. Shiota, H. Izumiya, T. Kubota, *Macromolecules* 2017, **50**, 865–871.
